# Supplementary material
Source: publisher figshare collection journal article supplement (https://gsapubs.figshare.com/articles/dataset/_/12542066)
Supplement: Supplementary file 1 [file 1]

## Sheet: Table DR3
TABLE DR3. ELECTRON MICROPROBE ANALYSES OF CLINOPYROXENE AND ORTHOPYROXENE FROM THE BURNEY MOUNTAIN DACITE DOME COMPLEX
	Data as oxides (weight %)													Trace elements (ppm)				Data as cations
Sample Name / Analysis ID	SiO2	TiO2	Al2O3	FeO	Fe2O3	MnO	MgO	CaO	Na2O	K2O	Cr2O3	NiO	Total		Cr (ppm)	Ni (ppm)		Si	Ti	Al(IV)	Al(VI)	Fe2+	Fe3+	Mn	Mg	Ca	Na	K	Cr	Ni		Wo	En	Fs
db1
Groundmass
B15DD025-GM-PYRX6	53.5215	0.1879	0.9212	15.8337	1.61574	0.4019	25.1559	1.8927	0.0865	0.004	0.0407	0.0867	99.7484		594.831	1103.26		1.95786	0.00517068	0.0397134	0	0.484367	0.0444766	0.0124516	1.37174	0.0741783	0.00613447	0.000186647	0.00117704	0.00255107		3.73279	69.0283	27.2389
B15DD025-GM-PYRX7	53.6434	0.2936	1.0094	16.4474	1.34279	0.4593	24.9718	1.975	0.0307	0.009	0.0085	0.0989	100.29		124.228	1258.5		1.95591	0.00805299	0.0433737	0	0.501498	0.0368426	0.0141835	1.35725	0.0771511	0.0021701	0.000418586	0.000245017	0.00290055		3.88293	68.3091	27.808
B15DD025-GM-PYRX8	54.4092	0.1852	0.5749	15.218	1.42321	0.3981	26.1992	1.7785	0.0628	0.0025	0.024	0.1143	100.39		350.76	1454.47		1.96857	0.00504067	0.0245133	0	0.460444	0.0387487	0.0121991	1.41301	0.0689406	0.00440501	0.000115379	0.000686492	0.00332642		3.45855	70.8864	25.655
B15DD025-GM-PYRX9	55.1008	0.1072	1.3873	9.9832	1.21865	0.248	29.975	1.331	0.0577	0.0048	0.3226	0.1154	99.8517		4714.8	1468.46		1.95278	0.00285798	0.0472182	0.0107242	0.295873	0.0325001	0.00744393	1.58355	0.0505377	0.00396442	0.000216993	0.00903868	0.00328967		2.56549	80.3872	17.0473
B15DD025-GM-PYRX10	54.3871	0.2543	1.0222	13.7521	1.63378	0.4058	27.024	2.0813	0.0448	0	0.0209	0.0196	100.646		305.453	249.41		1.9513	0.00686345	0.0432209	0	0.412608	0.0441094	0.0123309	1.44529	0.0800028	0.00311612	0	0.000592815	0.000565634		4.01149	72.4695	23.519
B15DD025-GM-PYRX11	53.8036	0.243	0.9032	16.3706	1.57541	0.4307	25.1588	1.8778	0.0845	0.0108	0.022	0.0255	100.506		321.53	324.488		1.95611	0.00664595	0.0386987	0	0.497721	0.0431006	0.0132621	1.36348	0.0731432	0.0059559	0.000500859	0.000632339	0.000745717		3.67423	68.4923	27.8335
B15DD025-GM-PYRX12	54.7722	0.1896	1.1854	11.8895	2.18368	0.3476	28.3562	1.7799	0.0832	0	0.0757	0.0741	100.937		1106.36	942.922		1.94488	0.00506452	0.0496052	0	0.35305	0.0583485	0.0104536	1.50092	0.0677126	0.00572748	0	0.00212507	0.00211642		3.40182	75.4048	21.1934
B15DD025-GM-PYRX13	54.2813	0.1974	1.3334	12.911	1.73021	0.371	27.4834	1.81	0.0443	0	0.04	0.0992	100.301		584.6	1262.32		1.94698	0.0053263	0.0530232	0.00334075	0.387266	0.0467001	0.0112704	1.46946	0.0695554	0.00308051	0	0.00113427	0.00286202		3.50537	74.0562	22.4384
B15DD025-GM-PYRX14	51.4334	0.6127	1.4029	10.2671	1.96206	0.2935	14.6466	18.294	0.3874	0.0112	0.056	0.0399	99.4068		818.44	507.727		1.93845	0.017371	0.0615519	0.000759313	0.323592	0.0556455	0.00936854	0.822855	0.738686	0.0283059	0.000538439	0.00166856	0.00120958		37.8785	42.1945	19.927
B15DD025-GM-PYRX15	52.0257	0.3102	1.1499	9.82594	0.28145	0.3282	16.2963	17.3034	0.2059	0	0.0108	0.056	97.7938		157.842	712.6		1.97059	0.00883869	0.0294103	0.0219194	0.311237	0.00802208	0.0105286	0.920119	0.702185	0.0151197	0	0.000323405	0.00170615		35.9709	47.135	16.8941
Phenocryst Cores & Rims
B15DD025-PH-PYRX1C-1	55.1656	0.1132	1.81	10.2785	0.719974	0.2698	29.7074	1.2747	0.0987	0.0022	0.4403	0.1613	100.042		6434.98	2052.54		1.95154	0.00301248	0.0484587	0.0270016	0.304075	0.0191661	0.00808363	1.56658	0.0483125	0.00676917	9.92753e-05	0.0123141	0.00458982		2.48239	80.4936	17.0241
B15DD025-PH-PYRX1C-2	54.8877	0.1814	1.7597	9.83117	1.27225	0.2747	29.8847	1.3898	0.054	0	0.3786	0.1342	100.048		5533.24	1707.7		1.94193	0.00482796	0.0580734	0.0152981	0.290873	0.0338718	0.00823136	1.5761	0.0526808	0.00370391	0	0.0105897	0.00381911		2.68538	80.3413	16.9733
B15DD025-PH-PYRX1C-3	55.4402	0.0332	1.5487	8.75058	2.49845	0.2586	30.8983	1.358	0.0369	0.0011	0.3934	0.1114	101.329		5749.54	1417.57		1.93349	0.000871012	0.0636525	0	0.255208	0.0655687	0.00763838	1.60631	0.0507411	0.0024949	4.8935e-05	0.0108467	0.00312503		2.55562	80.9035	16.5409
B15DD025-PH-PYRX2C	55.3305	0.0811	1.4039	10.1261	1.07757	0.2742	30.1065	1.4123	0.0435	0.0018	0.3195	0.0524	100.229		4669.49	666.79		1.9529	0.0021533	0.0471023	0.0112935	0.298878	0.0286199	0.00819666	1.58399	0.0534052	0.00297654	8.10394e-05	0.00891519	0.00148764		2.70668	80.2797	17.0136
B15DD025-PH-PYRX2R	52.9542	0.171	2.3942	13.3528	0.974383	0.341	26.5209	1.6968	0.0105	0	0.2184	0.0976	98.7317		3191.92	1241.96		1.9306	0.00468981	0.0694041	0.0334642	0.407102	0.0267319	0.0105293	1.44131	0.0662772	0.000742145	0	0.0062949	0.00286215		3.39544	73.8394	22.7651
B15DD025-PH-PYRX3C	52.96	0.2373	0.9979	18.8335	1.16573	0.4634	23.0902	2.0043	0.0594	0.0046	0.0368	0.0777	99.9308		537.832	988.733		1.95943	0.0066046	0.0405747	0.00293615	0.582709	0.0324554	0.0145208	1.27346	0.0794484	0.00426064	0.000217094	0.0010764	0.00231235		4.0073	64.232	31.7607
B15DD025-PH-PYRX3R	53.3188	0.2667	0.7832	16.6605	0	0.4269	24.7532	1.9091	0.0176	0	0.0222	0.0659	98.2241		324.453	838.577		1.97871	0.00744548	0.0212925	0.012961	0.517046	0	0.0134178	1.36934	0.0759053	0.00126626	0	0.000651328	0.00196715		3.84193	69.3088	26.8493
B15DD025-PH-PYRX4C	52.6167	0.3194	0.7753	20.9236	1.22735	0.5846	21.7899	1.8588	0.0758	0	0.0392	0.0405	100.251		572.908	515.362		1.9602	0.00895117	0.034039	0	0.651856	0.0344077	0.0184455	1.21007	0.074191	0.00547462	0	0.00115454	0.00121362		3.73013	60.839	35.4309
B15DD025-PH-PYRX4R	53.5158	0.2612	0.918	16.0695	1.60532	0.4625	24.8708	2.1647	0.047	0	0.028	0.1273	100.07		409.22	1619.89		1.95597	0.00718161	0.0395415	0	0.491158	0.044152	0.0143168	1.35503	0.0847658	0.00333033	0	0.000809066	0.00374249		4.26083	68.1117	27.6275
B15DD025-PH-PYRX5C	52.9405	0.1559	0.8622	18.3401	0.984133	0.3615	23.7201	1.8451	0.0074	0.0097	0.0421	0.0107	99.2795		615.291	136.157		1.96328	0.00434918	0.0367243	0.000957442	0.568767	0.0274634	0.0113542	1.31126	0.0733086	0.000532026	0.000458853	0.0012343	0.000319174		3.67987	65.8212	30.499
B15DD025-PH-PYRX5R	53.1908	0.2437	1.0113	17.867	0.494605	0.3897	23.9516	2.0311	0.011	0.0162	0.0356	0.0576	99.3002		520.294	732.96		1.96628	0.00677693	0.0337164	0.0103411	0.552334	0.0137587	0.012201	1.31984	0.080442	0.000788335	0.000763895	0.00104041	0.00171271		4.06565	66.7066	29.2277
B15DD025-PH-PYRX17C*	51.0527	0.4721	3.1218	6.07982	1.46289	0.205	15.7695	20.3352	0.2099	0.0038	0.0492	0.0136	98.7755		719.058	173.06		1.90494	0.0132515	0.0950627	0.0422141	0.189711	0.0410754	0.00647844	0.877117	0.812929	0.0151839	0.000180865	0.00145135	0.00040818		42.1794	45.5099	12.3107
B15DD025-PH-PYRX17R*	51.7537	0.4119	2.3264	6.46049	1.11709	0.2425	16.6725	19.4677	0.1753	0.0018	0.02	0.0253	98.6747		292.3	321.942		1.92855	0.0115465	0.0714527	0.0307126	0.201323	0.0313245	0.00765342	0.92612	0.777223	0.0126642	8.55599e-05	0.000589201	0.000758334		39.9879	47.6486	12.3634
B15DD025-PH-PYRX18C*	54.4409	0.1551	1.1649	10.8735	1.42166	0.3001	29.034	1.6846	0	0.0111	0.0173	0.0404	99.1436		252.839	514.09		1.95317	0.00418596	0.0468287	0.00242447	0.326231	0.0383813	0.00911876	1.55274	0.0647521	0	0.000507981	0.000490689	0.00116586		3.25187	77.9792	18.7689
B15DD025-PH-PYRX18R*	52.3227	0.3234	1.1287	18.0421	0.279256	0.5275	23.1642	2.0947	0.0303	0.0323	0.0082	0.0238	97.9772		119.843	302.855		1.96442	0.00913383	0.0355757	0.0143649	0.566464	0.0078896	0.0167734	1.2964	0.0842576	0.00220544	0.00154688	0.000243391	0.000718742		4.27316	65.7476	29.9792
B15DD025-PH-PYRX19C*	54.3134	0.1804	1.9702	9.4416	1.9081	0.3163	29.6076	1.8011	0.0137	0.029	0.1205	0.039	99.7409		1761.11	496.275		1.929	0.00481981	0.0709989	0.0114654	0.280421	0.0509958	0.00951435	1.56749	0.0685339	0.00094331	0.00131381	0.00338343	0.00111414		3.46663	79.2881	17.2452
B15DD025-PH-PYRX19R*	53.0172	0.1538	1.1443	15.2285	1.33092	0.3105	25.616	1.6134	0.0164	0.0239	0.1694	0.0403	98.6646		2475.78	512.817		1.95234	0.00426053	0.0476565	0.0020038	0.468959	0.0368808	0.00968402	1.40614	0.0636537	0.00117082	0.00112266	0.00493171	0.0011937		3.20622	70.8269	25.9668
B15DD025-PH-PYRX20C*	51.6986	0.4219	2.746	6.27571	1.78385	0.2632	17.267	18.579	0.1837	0.0452	0.0218	0.0303	99.3163		318.607	385.567		1.91184	0.0117368	0.0881609	0.031514	0.194077	0.0496409	0.00824353	0.951846	0.7361	0.0131701	0.00213216	0.000637344	0.000901294		37.9451	49.0666	12.9883
B15DD025-PH-PYRX20R*	51.7244	0.4658	2.6278	5.98123	1.69236	0.2033	16.7283	19.7252	0.1808	0.0293	0.0128	0.0231	99.3944		187.072	293.947		1.91386	0.0129653	0.086143	0.0284442	0.185073	0.0471212	0.00637098	0.922663	0.781947	0.0129694	0.0013829	0.000374428	0.000687507		40.2407	47.4822	12.2771
B15DD025-PH-PYRX21C*	52.658	0.3346	1.2778	16.1757	0.944911	0.6142	24.6477	1.8135	0.0273	0.0142	0.1399	0.015	98.6628		2044.64	190.875		1.94936	0.00931798	0.0506383	0.00510861	0.500762	0.0263225	0.0192572	1.36013	0.0719263	0.00195929	0.000670541	0.0040944	0.000446653		3.63557	68.7491	27.6153
B15DD025-PH-PYRX21R*	53.9183	0.1725	1.9645	9.22586	2.55947	0.2987	29.5245	1.7707	0.0098	0.0088	0.1088	0.0462	99.6081		1590.11	587.895		1.92019	0.00462131	0.0798117	0.00263815	0.27476	0.0685909	0.00900943	1.56736	0.0675608	0.000676616	0.00039976	0.00306324	0.00132343		3.39967	78.8695	17.7308
B15DD025-PH-PYRX22C*	51.2759	0.5013	2.0089	11.4847	0.287772	0.4228	15.8437	16.016	0.2162	0.0384	---	---	98.0735		---	---		1.94547	0.0143079	0.0545338	0.0352915	0.364394	0.00821612	0.0135863	0.896075	0.651038	0.0159028	0.00185845	---	---		33.6748	46.3493	19.9759
B15DD025-PH-PYRX22R*	52.7636	0.2289	0.6413	17.5496	0.5158	0.4678	23.817	2.0197	0.0296	0.0212	---	0.0116	98.0635		---	147.61		1.97412	0.00644249	0.025875	0.00240185	0.549093	0.0145221	0.0148236	1.32833	0.0809597	0.00214704	0.00101178	---	0.0003491		4.07299	66.8265	29.1005
db2
Groundmass
B15DD029-GM-PYRX3	53.313	0.2322	0.6947	15.7995	2.49775	0.4619	25.0055	1.9542	0.0693	0.0062	0.0073	0.0958	100.137		106.689	1219.05		1.94959	0.00638764	0.029939	0	0.483162	0.0687332	0.0143058	1.36309	0.0765634	0.00491306	0.000289208	0.000211046	0.00281791		3.817	67.9555	28.2275
B15DD029-GM-PYRX4	53.1096	0.2346	0.6953	18.15	1.19429	0.5028	23.6515	2.005	0.0405	0.0127	0	0.0366	99.6329		0	465.735		1.96454	0.00652804	0.0303102	0	0.56144	0.0332435	0.015752	1.30414	0.0794591	0.00290436	0.000599239	0	0.00108898		3.98484	65.402	30.6131
B15DD029-GM-PYRX5	55.1199	0.0341	0.6815	11.5127	1.82782	0.309	29.0689	1.6227	0.0164	0	0.0263	0.0507	100.27		384.374	645.157		1.96196	0.000913071	0.0285876	0	0.342689	0.048958	0.00931527	1.54237	0.0618817	0.00113171	0	0.000740087	0.00145158		3.08604	76.918	19.996
B15DD029-GM-PYRX6	54.3976	0.1899	0.781	12.9959	1.4607	0.4124	27.7098	1.633	0.0233	0.0097	0	0.0633	99.6766		0	805.492		1.96131	0.00515063	0.0331855	0	0.391844	0.0396311	0.0125933	1.48929	0.0630806	0.00162867	0.000446117	0	0.00183579		3.15966	74.5973	22.243
B15DD029-GM-PYRX7	53.4689	0.1834	1.8675	12.7927	2.54069	0.386	27.0309	1.7137	0.0639	0	0.0426	0.0847	100.175		622.599	1077.81		1.92507	0.00496722	0.074927	0.0043116	0.385165	0.0688344	0.0117703	1.45072	0.0661032	0.00446021	0	0.00121255	0.0024529		3.33418	73.1729	23.4929
B15DD029-GM-PYRX8	53.8312	0.2718	1.066	17.2067	1.0273	0.5032	24.3211	2.63	0	0	0	0.0614	100.919		0	781.315		1.95746	0.00743494	0.0425353	0.00314695	0.523235	0.0281102	0.0154973	1.31832	0.102461	0	0	0	0.00179589		5.15494	66.3264	28.5186
B16DD066-GM-PYRX8	53.7129	0.1624	1.976	11.6589	1.89081	0.3304	27.7162	2.0958	0.011	0.0343	0.1109	0.0475	99.7471		1620.8	604.438		1.92921	0.00438787	0.0707937	0.0128468	0.350183	0.0511041	0.0100507	1.48392	0.0806476	0.000765951	0.00157146	0.00314903	0.00137229		4.08155	75.1008	20.8177
B16DD066-GM-PYRX10	54.3811	0.1173	1.6966	10.3915	2.21152	0.3324	28.4901	2.4568	0.0558	0.0278	0.1458	0.0454	100.352		2130.87	577.715		1.93353	0.0031374	0.066465	0.00462579	0.308973	0.0591701	0.0100097	1.50999	0.0935871	0.00384633	0.00126083	0.00409833	0.00129841		4.72249	76.1956	19.0819
B16DD066-GM-PYRX13	54.4634	0.096	1.3378	10.3814	2.27988	0.3031	28.915	2.0306	0.0455	0.0231	0.0822	0.0349	99.9929		1201.35	444.102		1.94071	0.00257333	0.0561794	0	0.309349	0.0611329	0.00914737	1.53588	0.0775215	0.00314322	0.00104997	0.00231565	0.0010003		3.88963	77.0625	19.0479
B16DD066-GM-PYRX14	55.2628	0.1614	0.72	10.3579	1.71985	0.3309	29.7659	1.7851	0.0085	0.0294	0.0699	0.0211	100.233		1021.59	268.498		1.95831	0.0043025	0.0300685	0	0.306945	0.0458615	0.00993117	1.57234	0.0677725	0.000583951	0.00132894	0.00195826	0.000601427		3.38381	78.5051	18.1111
B16DD066-GM-PYRX15	55.3729	0.0923	0.6742	10.2688	1.90093	0.279	29.8113	1.7507	0.0293	0.0294	0.0864	0.0481	100.343		1262.74	612.072		1.95999	0.00245769	0.0281239	0	0.303959	0.0506327	0.00836404	1.57295	0.0663913	0.00201064	0.00132744	0.00241778	0.00136947		3.31575	78.5573	18.1269
B15DD029-GM-PYRX9	51.6159	0.3989	1.9462	7.18301	1.65382	0.2972	16.2774	19.0449	0.1915	0.0084	0.0633	0.0933	98.7738		925.13	1187.24		1.93159	0.0112296	0.0684125	0.0174194	0.22479	0.0465724	0.00941965	0.908018	0.763576	0.0138934	0.000400977	0.00187275	0.00280843		39.1101	46.5084	14.3816
B15DD029-GM-PYRX10	52.0762	0.4205	1.8498	7.00088	1.48049	0.2424	16.0573	19.9525	0.2445	0.0074	0.0737	0.0221	99.4278		1077.13	281.223		1.93559	0.0117573	0.0644124	0.0166143	0.217603	0.0414083	0.00763063	0.889657	0.794534	0.0176182	0.000350844	0.00216564	0.000660719		40.7279	45.6039	13.6681
B15DD029-GM-PYRX11	51.1347	0.4569	3.0312	5.17283	2.25058	0.2416	16.5047	19.5362	0.3191	0.0081	0.1277	0.0649	98.8485		1866.34	825.852		1.90109	0.0127784	0.0989092	0.033901	0.160825	0.0629634	0.00760744	0.914686	0.77816	0.0229997	0.000384132	0.00375338	0.00194081		40.4398	47.5349	12.0253
B15DD029-GM-PYRX12	51.7666	0.3637	1.1932	10.4327	1.38206	0.3747	15.935	17.0234	0.2186	0.0137	0	0.0513	98.7549		0	652.793		1.95341	0.0103241	0.0465947	0.00646759	0.329213	0.0392444	0.0119752	0.896341	0.688226	0.0159919	0.000659436	0	0.00155708		35.0242	45.6153	19.3604
B15DD029-GM-PYRX13	50.5443	0.6027	3.1743	5.65427	2.07505	0.2338	16.7235	18.8152	0.2214	0	0.1538	0.0521	98.2504		2247.79	662.972		1.89116	0.0169639	0.108838	0.0311321	0.176918	0.0584243	0.00740893	0.93274	0.754236	0.0160599	0	0.00454944	0.001568		39.0851	48.3353	12.5796
B15DD029-GM-PYRX14	51.2749	0.4918	1.4862	10.0947	1.89048	0.3995	15.9247	16.7837	0.2296	0.002	0.0259	0.1034	98.7068		378.529	1315.77		1.93727	0.0139779	0.0627271	0.00344783	0.318946	0.0537487	0.0127837	0.89688	0.679385	0.0168177	9.63885e-05	0.000773626	0.00314238		34.6317	45.7185	19.6498
B15DD029-GM-PYRX15	52.15	0.3182	1.4997	8.11505	0.94911	0.2712	16.3193	18.9585	0.1568	0.0054	0.0532	0.047	98.8435		777.518	598.075		1.95107	0.00895542	0.0489342	0.0171888	0.253892	0.0267204	0.00859335	0.910119	0.759913	0.0113729	0.000257704	0.00157353	0.00141438		38.7862	46.4527	14.7611
B15DD029-GM-PYRX16	52.6616	0.2217	1.6629	4.26517	1.80834	0.154	16.9859	21.1105	0.2641	0	0.162	0.0703	99.3665		2367.63	894.567		1.9418	0.00614955	0.0582049	0.0140564	0.131518	0.0501763	0.00480933	0.933634	0.83397	0.0188793	0	0.00472247	0.00208505		42.6778	47.778	9.54419
B15DD029-GM-PYRX17	52.8163	0.2452	1.5886	4.60884	1.41775	0.1772	16.9	21.168	0.2317	0.0044	0.1839	0.0895	99.4313		2687.7	1138.89		1.94738	0.00680096	0.0526244	0.0164038	0.142106	0.0393358	0.0055335	0.928848	0.836187	0.0165621	0.00020694	0.00536054	0.00265434		42.8372	47.5842	9.57861
B16DD066-GM-PYRX6	51.6906	0.3799	2.5439	6.20532	1.06738	0.2214	16.573	19.4435	0.2166	0.0273	0.1975	0.0639	98.6303		2886.46	813.127		1.92601	0.0106484	0.0739872	0.0377191	0.193353	0.0299277	0.00698683	0.920505	0.776183	0.0156464	0.00129754	0.00581781	0.00191514		40.2803	47.7699	11.9498
B16DD066-GM-PYRX7	51.682	0.3661	1.4973	8.7684	2.57044	0.3062	16.1724	17.9282	0.2188	0.0319	0.035	0.0499	99.6266		511.525	634.977		1.9303	0.0102862	0.065906	0	0.273871	0.0722439	0.00968603	0.900403	0.717406	0.0158432	0.0015198	0.00103347	0.00149912		36.3499	45.6222	18.0279
B16DD066-GM-PYRX9	51.9419	0.3102	1.627	6.59622	1.72039	0.2442	16.5235	19.4673	0.2104	0.0418	0.0872	0.0175	98.7877		1274.43	222.688		1.93918	0.00871183	0.0608217	0.0107625	0.205937	0.0483319	0.00772147	0.919558	0.778659	0.0152284	0.0019906	0.00257372	0.000525519		39.7233	46.9113	13.3654
B16DD066-GM-PYRX11	51.6595	0.3016	1.5893	7.49751	2.08613	0.265	16.8204	18.2577	0.1741	0.0123	0.0497	0.0213	98.7346		726.366	271.043		1.93359	0.00849208	0.0664072	0.00369809	0.234677	0.0587575	0.00840069	0.938487	0.732154	0.0126334	0.000587258	0.00147067	0.000641277		37.1185	47.5791	15.3023
B16DD066-GM-PYRX12	50.7223	0.4219	3.1344	4.60569	3.4686	0.2068	16.3779	20.2754	0.1888	0.0102	0.0649	0.0491	99.526		948.514	624.797		1.87901	0.0117573	0.12099	0.0158502	0.142681	0.0966924	0.00648837	0.904412	0.804715	0.0135594	0.000481992	0.00190073	0.00146306		41.1621	46.2618	12.5761
Phenocryst Cores & Rims
B15DD029-PH-PYRX1C	54.1033	0.2003	1.1067	12.9444	1.94107	0.332	27.5372	1.7138	0.005	0.0121	0.009	0.0883	99.9932		131.535	1123.62		1.94769	0.00542431	0.0469522	0	0.389689	0.052583	0.0101225	1.47772	0.0660995	0.000348959	0.000555636	0.000256143	0.00255686		3.31124	74.0262	22.6626
B15DD029-PH-PYRX1R	48.7372	1.1654	5.0347	18.8444	1.83547	0.5197	9.24404	13.1707	1.1457	0.4049	0	0.0204	100.123		0	259.59		1.87863	0.0337928	0.121372	0.107337	0.607437	0.0532396	0.0169663	0.531153	0.543916	0.085617	0.0199084	0	0.000632502		31.0328	30.3047	38.6626
B15DD029-PH-PYRX2C	54.0059	0.2265	2.0704	10.2262	2.2003	0.3259	28.8957	1.7339	0.0227	0	0.2098	0.1365	100.054		3066.23	1736.96		1.92276	0.00606626	0.0772357	0.00963413	0.304465	0.0589487	0.00982706	1.53354	0.0661379	0.00156682	0	0.00590521	0.00390903		3.35229	77.7295	18.9182
B15DD029-PH-PYRX2R	51.6189	0.3518	2.0409	6.57729	1.79532	0.2458	16.9	18.9423	0.1765	0.0017	0.0245	0	98.6749		358.068	0		1.92611	0.00987498	0.0738911	0.0158568	0.205238	0.0504106	0.00776799	0.940016	0.757264	0.0127681	8.09152e-05	0.000722742	0		38.6222	47.943	13.4349
B15DD029-PH-PYRX16C*	51.7929	0.6949	1.9864	8.50572	1.82195	0.2793	16.0471	18.6466	0.2575	0.0138	---	0.0142	100.044		---	180.695		1.92198	0.0193985	0.0780205	0.00885058	0.263954	0.0508773	0.00877817	0.887672	0.741345	0.0185253	0.000653231	---	0.000423856		37.9665	45.4604	16.5731
B15DD029-PH-PYRX16R*	52.761	0.274	2.2448	4.13972	1.40377	0.1557	17.7239	20.5976	0.1747	0.0278	0.2629	0.0568	99.8227		3842.28	722.78		1.92949	0.00753784	0.0705148	0.0262319	0.126601	0.0386308	0.00482249	0.966196	0.807025	0.012386	0.00129683	0.00760088	0.00167081		41.5291	49.72	8.75093
B15DD029-PH-PYRX17C*	55.3428	0.1233	0.9971	10.1372	1.40101	0.2948	30.1053	1.489	0.0166	0.0296	0.0946	0.0401	100.071		1382.58	510.272		1.95833	0.00328213	0.0415809	0	0.299973	0.0373056	0.00883501	1.58798	0.0564497	0.00113878	0.00133606	0.00264643	0.00114135		2.83589	79.7762	17.3879
B15DD029-PH-PYRX18C*	53.5419	0.2112	1.4236	4.53839	1.22844	0.2134	18.4062	20.1592	0.1573	0.0145	0.1415	0.0176	100.053		2068.02	223.96		1.95117	0.00578979	0.0488317	0.0123074	0.138307	0.033687	0.00658643	0.999868	0.787075	0.0111132	0.000674028	0.00407664	0.000515899		40.0441	50.8703	9.08562
B15DD029-PH-PYRX19C*	53.633	0.185	1.7469	11.2616	1.92327	0.3561	28.0278	1.7874	0.0338	0.0375	0.0835	0.0545	99.1303		1220.35	693.513		1.9342	0.0050189	0.0658034	0.00844153	0.33963	0.0521935	0.0108767	1.50673	0.0690609	0.00236316	0.00172508	0.00238067	0.00158094		3.49059	76.1555	20.3539
B15DD029-PH-PYRX19R*	53.5508	0.2387	1.0451	14.777	0.743201	0.4256	25.9398	1.9423	0.0386	0.0068	0.032	0.0403	98.7802		467.68	512.817		1.96285	0.00658176	0.0371488	0.00799612	0.452948	0.0204991	0.0132123	1.41731	0.0762746	0.00274294	0.000317936	0.000927292	0.00118817		3.85177	71.5725	24.5757
B15DD029-PH-PYRX20C*	53.3107	0.223	0.6953	17.0884	0.597401	0.4192	24.3578	2.1067	0.0311	0.0288	0.003	0.0302	98.8916		43.845	384.295		1.97296	0.00620836	0.027039	0.00328637	0.528866	0.0166371	0.0131395	1.34375	0.0835312	0.00223138	0.00135958	8.77749e-05	0.000899005		4.20616	67.6638	28.1301
B15DD029-PH-PYRX20R*	52.3845	0.2881	1.2529	8.96347	1.33382	0.3208	17.3333	16.888	0.1966	0.0341	0.0397	0.022	99.0573		580.216	279.95		1.95366	0.00808272	0.0463395	0.00872771	0.279552	0.0374326	0.0101329	0.963618	0.674787	0.0142147	0.00162222	0.00117053	0.000659964		34.3312	49.0261	16.6428
B15DD029-PH-PYRX21C*	54.246	0.1554	0.8006	13.7795	0.856779	0.3675	27.0848	1.7847	0.0111	0.0392	0.0382	0.0411	99.2049		558.293	522.997		1.96888	0.00424298	0.0311161	0.00312899	0.418241	0.0234007	0.011297	1.4654	0.0694	0.000781059	0.00181488	0.00109613	0.0011999		3.49141	73.7219	22.7866
B15DD029-PH-PYRX21R*	53.3244	0.2656	1.218	15.2736	1.0235	0.4569	25.4756	2.039	0.0112	0.0354	0.0061	0.0294	99.1587		89.1515	374.115		1.95427	0.0073224	0.0457348	0.00687114	0.4681	0.0282261	0.0141819	1.39174	0.0800602	0.000795763	0.00165489	0.000176739	0.000866675		4.03873	70.2081	25.7532
B16DD066-PH-PYRX1C	53.7849	0.2043	2.0611	10.3566	3.02282	0.3515	27.9493	2.7091	0.0649	0.0163	0.1678	0.0504	100.739		2452.4	641.34		1.91259	0.0054651	0.0863756	0	0.307978	0.0808878	0.0105862	1.48153	0.103212	0.0044742	0.000739365	0.00471736	0.0014416		5.2017	74.6666	20.1317
B16DD066-PH-PYRX1R	52.9345	0.1312	1.6747	16.4997	0.868614	0.4773	24.6895	1.7876	0.0192	0.0148	0.0676	0	99.1648		987.974	0		1.94807	0.00363219	0.0519271	0.0207058	0.507786	0.0240548	0.0148769	1.35443	0.0704821	0.00136986	0.000694763	0.00196679	0		3.57481	68.696	27.7292
B16DD066-PH-PYRX2C	54.4554	0.1659	0.7434	12.8577	1.33316	0.3927	27.8472	1.7144	0.0136	0.0076	0.0563	0.0314	99.6187		822.825	399.565		1.9624	0.00449739	0.0315718	0	0.387479	0.0361523	0.0119857	1.49591	0.0661913	0.000950154	0.000349357	0.00160398	0.00091018		3.31334	74.8809	21.8057
B16DD066-PH-PYRX2R	54.1427	0.2445	1.0843	12.5818	3.00089	0.4353	27.7578	1.7695	0.03	0.0184	0.0561	0	101.121		819.901	0		1.93105	0.00655994	0.0455756	0	0.375261	0.0805399	0.0131491	1.47576	0.0676154	0.00207435	0.000837105	0.00158183	0		3.36007	73.336	23.3039
B16DD066-PH-PYRX3R-1	51.5885	0.3897	3.0378	4.84309	2.72836	0.1657	16.4118	20.6994	0.2607	0.012	0.2027	0.0036	100.343		2962.46	45.81		1.89263	0.010755	0.107368	0.0239733	0.148585	0.0753222	0.00514861	0.897523	0.813603	0.0185422	0.000561569	0.00587911	0.000106235		41.9344	46.2597	11.8059
B16DD066-PH-PYRX3R-2	51.2211	0.6022	1.7578	9.99781	1.8522	0.3375	14.9032	18.5123	0.2355	0.0256	0.0165	0	99.4617		241.148	0		1.92674	0.0170405	0.0732611	0.00466322	0.314498	0.0524286	0.0107523	0.83566	0.746064	0.0171741	0.00122835	0.000490685	0		38.0761	42.6487	19.2752
B16DD066-PH-PYRX5C	53.7823	0.1933	2.0063	8.88373	4.02821	0.2738	28.7979	2.6243	0.0842	0.0284	0.1385	0.0532	100.894		2024.18	676.97		1.90253	0.00514389	0.0836407	0	0.262801	0.107229	0.00820313	1.51855	0.0994597	0.00577447	0.0012815	0.00387335	0.00151375		4.98234	76.0705	18.9472
B16DD066-PH-PYRX5R	51.7857	0.2989	2.0405	6.22926	1.022	0.2954	17.5771	18.3139	0.1575	0.0214	0.0718	0.0262	97.8397		1049.36	333.395		1.93814	0.00841532	0.0618556	0.0281445	0.194963	0.028783	0.00936358	0.980624	0.734344	0.0114279	0.00102164	0.00212445	0.000788731		37.6958	50.338	11.9661
B16DD066-PH-PYRX13C*	54.6997	0.0953	2.0375	7.31759	3.74421	0.24	30.9433	1.5604	0.0819	0.0462	0.2862	0.0894	101.142		4182.81	1137.61		1.9088	0.00250171	0.0837922	0	0.213542	0.0983205	0.00709319	1.60961	0.0583383	0.00554075	0.00205649	0.0078957	0.00250937		2.93615	81.0109	16.0529
B16DD066-PH-PYRX13R*	55.0731	0.0842	1.4759	7.9266	2.43875	0.2774	31.1037	1.4059	0.0357	0.0365	0.3481	0.0705	100.276		5087.48	897.112		1.9342	0.00222455	0.0610869	0	0.232802	0.0644521	0.0082513	1.62836	0.0529003	0.00243074	0.00163517	0.00966519	0.0019916		2.66263	81.9603	15.377
B16DD066-PH-PYRX14C*	55.4772	0.0683	0.9367	7.0151	3.41536	0.2751	31.6801	1.6634	0.0352	0.0261	0.3113	0.0911	100.995		4549.65	1159.25		1.9342	0.00179133	0.0384872	0	0.204531	0.0896047	0.00812328	1.64646	0.0621334	0.00237923	0.00116074	0.00858045	0.00255479		3.08991	81.8787	15.0314
B16DD066-PH-PYRX14R*	52.6857	0.2328	0.9986	16.0014	2.56899	0.4809	24.6386	1.9401	0.0514	0.006	0.0412	0.0213	99.667		602.138	271.043		1.93835	0.00644304	0.0432974	0	0.492308	0.0711231	0.0149847	1.35124	0.0764726	0.00366616	0.000281579	0.00119835	0.000630334		3.81194	67.3556	28.8324
B16DD066-PH-PYRX15C*	52.0782	0.3437	2.4346	4.95153	2.47039	0.2122	17.2276	20.0315	0.2014	0.0283	0.15	0.0089	100.138		2192.25	113.252		1.90974	0.00948123	0.090264	0.0149503	0.151844	0.0681695	0.00659049	0.941715	0.786997	0.0143181	0.00132377	0.00434864	0.000262518		40.2491	48.1618	11.5891
B16DD066-PH-PYRX15R*	52.2829	0.3713	2.2609	5.60961	2.30227	0.2352	17.8129	18.9829	0.1743	0.0187	0.0591	0.0239	100.134		863.746	304.127		1.91569	0.0102343	0.0843119	0.0133166	0.171885	0.063479	0.00729889	0.97292	0.745195	0.0123814	0.000874009	0.00171198	0.000704392		38.0051	49.6191	12.3758
B16DD066-PH-PYRX16C*	54.0303	0.1604	1.21	10.2657	3.11928	0.3204	28.7419	2.0617	0.0179	0.0278	0.1322	0.042	100.13		1932.1	534.45		1.92893	0.00430776	0.050909	0	0.306484	0.0837995	0.00968783	1.52958	0.0788582	0.00123891	0.001266	0.00373126	0.00120609		3.9264	76.1588	19.9148
B16DD066-PH-PYRX16R*	52.5511	0.3421	1.9155	5.36224	2.63851	0.2353	18.0263	18.9163	0.2402	0.0062	0.0601	0.0167	100.311		878.361	212.507		1.92131	0.00940885	0.078691	0.00384197	0.163946	0.072591	0.00728605	0.982425	0.740958	0.0170254	0.000289145	0.00173714	0.000491115		37.6655	49.9401	12.3944
Phenocryst Transect 1
B16DD066-PH-PYRX4-C-R-Trans-1	53.9724	0.2097	1.0121	15.518	2.27334	0.4857	25.9419	1.7982	0.0065	0.0194	0.0445	0.029	101.311		650.368	369.025		1.94294	0.00567877	0.0429379	0	0.467158	0.061583	0.0148085	1.39209	0.0693534	0.000453638	0.000890838	0.00126646	0.000839725		3.45903	69.4312	27.1098
B16DD066-PH-PYRX4-C-R-Trans-2	53.9711	0.2025	1.7538	11.3672	1.31813	0.295	27.8185	2.414	0.0234	0.0183	0.1696	0.073	99.4245		2478.7	928.925		1.94047	0.00547696	0.0595281	0.0147835	0.341774	0.0356626	0.00898303	1.49093	0.0929877	0.00163106	0.000839279	0.00482078	0.00211116		4.71938	75.6688	19.6118
B16DD066-PH-PYRX4-C-R-Trans-3	54.053	0.1415	1.8458	11	1.69607	0.3034	27.8309	2.6773	0.0418	0.0259	0.1923	0.0501	99.8581		2810.46	637.522		1.93517	0.00381086	0.0648329	0.0130448	0.329329	0.0456932	0.00919959	1.48526	0.102692	0.00290124	0.00118279	0.0054428	0.00144274		5.20705	75.3108	19.4821
B16DD066-PH-PYRX4-C-R-Trans-4	54.3767	0.2185	1.7016	10.9165	1.49232	0.2878	28.2973	2.4485	0.0147	0.0278	0.121	0.0976	100		1768.41	1241.96		1.94055	0.00586586	0.0594502	0.0121147	0.325789	0.0400758	0.00869877	1.50534	0.0936169	0.00101704	0.00126551	0.00341383	0.00280165		4.74365	76.2769	18.9795
B16DD066-PH-PYRX4-C-R-Trans-5	54.2632	0.218	1.3646	12.5578	1.61439	0.294	27.4733	2.1373	0.0937	0.0275	0	0	100.044		0	0		1.94735	0.00588523	0.0526513	0.00506178	0.37687	0.043597	0.00893595	1.4697	0.0821762	0.00651908	0.00125887	0	0		4.14764	74.1793	21.673
db3
Groundmass
B15DD027-GM-PYRX1	53.1117	0.244	1.1239	15.1777	1.49173	0.4118	25.3578	1.876	0.0339	0.0106	0.0145	0.1185	98.9721		211.918	1507.91		1.95301	0.00674951	0.0469895	0.00171533	0.466722	0.0412774	0.0128249	1.38996	0.0739076	0.0024167	0.000497198	0.000421529	0.00350496		3.72388	70.0341	26.2421
B15DD027-GM-PYRX2	53.3008	0.2462	1.3817	13.8227	2.09123	0.357	26.3819	1.7861	0.0608	0	0.0179	0.0616	99.508		261.608	783.86		1.93872	0.00673654	0.0592277	0	0.420449	0.0572389	0.0109977	1.43042	0.0696031	0.00428739	0	0.000514729	0.00180224		3.49991	71.9271	24.573
B15DD027-GM-PYRX3	51.1639	0.758	4.3472	16.6604	0	0.5068	10.8723	15.0426	0	0	0.0191	0.1055	99.4758		279.147	1342.49		1.97464	0.022007	0.0253603	0.172366	0.537711	0	0.0165659	0.625494	0.621998	0	0	0.000582777	0.00327512		34.5215	34.7155	30.7629
B15DD027-GM-PYRX4	52.7479	0.2418	1.2977	6.7056	0	0.222	17.5046	18.8454	0.1451	0.0067	0.0665	0.0642	97.8475		971.898	816.945		1.97313	0.00680415	0.0268737	0.0303339	0.209762	0	0.00703327	0.976066	0.755261	0.0105227	0.000319693	0.0019666	0.00193168		38.7687	50.1029	11.1284
Phenocryst Cores & Rims
B15DD027-PH-PYRX5C*	55.048	0.1263	0.9156	10.145	3.03512	0.3111	29.9822	1.4222	0.0035	0.0298	0.0142	0.037	101.07		207.533	470.825		1.93906	0.00334674	0.038009	0	0.298841	0.0804515	0.00928122	1.57431	0.0536726	0.000239016	0.00133898	0.000395443	0.00104834		2.66159	78.0693	19.2691
B15DD027-PH-PYRX5R*	52.8212	0.1808	0.6757	19.9931	1.0776	0.5278	22.7822	1.5603	0.0196	0.0259	0.0069	0.0069	99.678		100.844	87.8025		1.96645	0.00506338	0.0296454	0	0.622435	0.0301884	0.0166417	1.26429	0.0622335	0.00141462	0.00122994	0.00020308	0.000206621		3.11824	63.3479	33.5339
B15DD027-PH-PYRX6C*	54.9488	0.1484	1.2482	10.5749	2.52473	0.3102	29.7252	1.3363	0.0202	0.0045	0.0323	0.0509	100.925		472.065	647.702		1.93839	0.00393809	0.0518917	0	0.311961	0.0670203	0.00926787	1.5631	0.0505044	0.00138148	0.000202491	0.000900805	0.00144428		2.52289	78.0826	19.3945
B15DD027-PH-PYRX6R*	53.1531	0.1471	0.7074	18.7867	1.24848	0.4418	23.9238	1.322	0.0152	0.0326	0.0168	---	99.7777		245.532	---		1.96371	0.00408818	0.0307996	0	0.580415	0.0347089	0.0138239	1.31752	0.0523267	0.00108868	0.0015363	0.000490686	---		2.61791	65.9157	31.4663
B15DD027-PH-PYRX7C*	54.9381	0.139	1.3161	9.86371	3.19065	0.3327	30.1082	1.4159	0.0084	0.0244	0.0341	0.0081	101.379		498.371	103.072		1.92759	0.00366879	0.0544201	0	0.289414	0.0842417	0.00988662	1.57472	0.0532249	0.000571384	0.00109204	0.000945888	0.0002286		2.64605	78.2863	19.0676
B15DD027-PH-PYRX7R*	53.4487	0.1209	0.941	15.8802	2.06474	0.3844	25.7848	1.2624	0.0088	0.0197	0.0139	0.0253	99.9548		203.148	321.942		1.94944	0.00331716	0.0404475	0	0.484357	0.0566689	0.0118743	1.40189	0.04933	0.000622247	0.000916531	0.000400804	0.000742239		2.46143	69.9503	27.5882
B15DD027-PH-PYRX8C*	53.7905	0.1722	0.8072	15.6577	1.33855	0.425	25.7731	1.7186	0.022	0.0135	0.0074	0.0358	99.7616		108.151	455.555		1.9616	0.00472396	0.0346909	0	0.477499	0.0367322	0.0131265	1.40103	0.0671462	0.00155538	0.000627983	0.000213344	0.00105012		3.36482	70.2083	26.4268
B15DD027-PH-PYRX8R*	53.8129	0.139	0.6504	17.1156	1.21044	0.4152	25.0265	1.6153	0.0161	0.0291	---	0.033	100.063		---	419.925		1.96774	0.00382353	0.028028	0	0.523375	0.0333069	0.0128586	1.36414	0.0632815	0.00114134	0.00135732	---	0.000970615		3.16889	68.3108	28.5203
B15DD027-PH-PYRX9C*	54.8854	0.1912	1.4841	10.573	2.30648	0.2787	29.7044	1.401	0.0128	0.0185	0.0483	0.0309	100.935		705.904	393.202		1.93457	0.00506972	0.0616484	0	0.31165	0.0611768	0.00831994	1.56073	0.0529065	0.000874675	0.000831782	0.00134592	0.000876069		2.65225	78.2405	19.1072
B15DD027-PH-PYRX9R*	53.0591	0.1282	0.6838	19.0363	1.08806	0.4632	23.4836	1.5821	0.0089	0.0255	---	0.018	99.5552		---	229.05		1.96807	0.00357715	0.029891	0	0.590477	0.0303697	0.0145514	1.29844	0.0628719	0.000639998	0.00120651	---	0.000537037		3.14877	65.029	31.8222
db4
Groundmass
B16DD067-GM-PYRX3	53.2215	0.248	1.8075	15.2019	0	0.3131	24.9017	2.1514	0.0925	0.0415	0.1173	0.0013	98.0977		1714.34	16.5425		1.96631	0.00689261	0.0336931	0.0450065	0.469679	0	0.0097972	1.37142	0.0851584	0.00662543	0.00195579	0.00342616	3.8633e-05		4.39855	70.8358	24.7656
B16DD067-GM-PYRX4	53.6904	0.2155	0.6064	16.8085	1.89802	0.4494	24.702	2.0506	0.0588	0.0286	0.0207	0.0396	100.569		302.531	503.91		1.95861	0.00591379	0.0260699	0	0.512767	0.0521026	0.0138848	1.34326	0.0801445	0.0041585	0.00133084	0.000596989	0.00116198		4.0029	67.0906	28.9065
B16DD067-GM-PYRX7	54.2111	0.2083	0.784	16.0281	1.02497	0.4069	25.7375	1.9074	0.0443	0.0151	0.0209	0	100.389		305.453	0		1.9652	0.00568036	0.0334938	0	0.485891	0.0279601	0.0124928	1.39079	0.0740802	0.00311337	0.000698239	0.000598976	0		3.72035	69.8463	26.4333
B16DD067-GM-PYRX8	54.1932	0.1689	0.6248	17.9393	0.660071	0.4823	24.2878	2.1016	0.07	0.026	0	0.048	100.602		0	610.8		1.97736	0.00463595	0.0226413	0.00422524	0.547375	0.0181234	0.0149043	1.32101	0.0821548	0.00495162	0.0012101	0	0.00140875		4.14177	66.5977	29.2605
B16DD067-GM-PYRX9	54.7655	0.1585	1.5898	12.8657	0.538089	0.3198	27.8095	1.9021	0.049	0.0334	0.0465	0.0362	100.114		679.597	460.645		1.95785	0.00426256	0.0421469	0.0248331	0.384634	0.0144756	0.00968292	1.48198	0.0728532	0.00339608	0.0015231	0.00131423	0.00104096		3.71013	75.4717	20.8182
B16DD067-GM-PYRX10	53.8776	0.2791	0.7538	18.0692	0	0.4758	23.6114	2.1796	0.0329	0.0453	0.0416	0.0229	99.3892		607.984	291.402		1.99189	0.00776221	0.00810892	0.0247341	0.558644	0	0.0148983	1.30124	0.0863329	0.0023581	0.00213631	0.00121589	0.000680995		4.40224	66.352	29.2458
B16DD067-GM-PYRX11	54.0434	0.2395	0.6272	18.1127	0.711023	0.4822	24.2763	2.0806	0.0138	0.0347	0.0374	0.0454	100.704		546.601	577.715		1.97226	0.006575	0.0269748	0	0.552771	0.019526	0.014904	1.32063	0.0813491	0.000976359	0.00161533	0.00107904	0.00133269		4.08957	66.3907	29.5197
B16DD067-GM-PYRX12	53.7817	0.2042	0.8161	17.9525	0.30518	0.4855	24.0433	2.1202	0.0383	0.0517	0.0666	0.0493	99.9146		973.359	627.342		1.97554	0.00564254	0.02446	0.0108684	0.551464	0.00843558	0.0151041	1.31651	0.0834392	0.00272746	0.00242243	0.00193406	0.00145663		4.22488	66.6603	29.1148
B16DD067-GM-PYRX14	54.0037	0.1463	1.3811	11.9185	1.5682	0.3394	28.0001	1.8441	0.0271	0	0.1119	0.0166	99.357		1635.42	211.235		1.9453	0.00396438	0.0546995	0.00393026	0.359025	0.0425083	0.0103545	1.50349	0.0711688	0.00189252	0	0.00318668	0.000480975		3.58254	75.6836	20.7339
B16DD067-GM-PYRX5	52.729	0.3796	1.1808	9.85315	1.38105	0.3345	16.1534	17.9595	0.2369	0.0401	0.0647	0.0622	100.375		945.59	791.495		1.95473	0.010586	0.0452749	0.00631237	0.305457	0.0385259	0.0105024	0.892643	0.7133	0.0170259	0.00189622	0.00189621	0.00185472		36.3849	45.533	18.0821
B16DD067-GM-PYRX6	51.595	0.4569	1.6271	8.74128	2.14131	0.3347	15.4445	18.7598	0.2871	0.0286	0.054	0.0157	99.486		789.21	199.782		1.93184	0.0128693	0.0681574	0.00363994	0.273702	0.0603325	0.0106139	0.862016	0.752548	0.0208404	0.00136596	0.00159846	0.000472841		38.4107	43.9981	17.5912
B16DD067-GM-PYRX13	52.4391	0.3211	2.4691	8.89485	0	0.282	17.0382	17.4466	0.1924	0.0007	0.1132	0	99.1972		1654.42	0		1.94541	0.00896117	0.0545879	0.0533628	0.275952	0	0.00886054	0.942231	0.693441	0.0138379	3.31256e-05	0.00332007	0		36.1076	49.0622	14.8303
B16DD067-GM-PYRX15	53.1916	0.2524	1.6452	6.71349	0.497747	0.2087	16.9159	20.2344	0.1689	0.0029	0.2052	0.014	100.05		2999	178.15		1.95405	0.00697509	0.0459518	0.0252746	0.206243	0.0137597	0.00649336	0.926328	0.796388	0.012029	0.000135894	0.00595956	0.000413687		40.8569	47.5232	11.6199
Phenocryst Cores & Rims
B16DD067-PH-PYRX1C	55.1745	0.1188	0.8249	12.5475	0.755556	0.3649	28.3316	1.7974	0.0579	0.0148	0.0486	0.0171	100.054		710.289	217.598		1.97143	0.00319321	0.0285708	0.00616476	0.374921	0.020315	0.0110426	1.50901	0.0688065	0.00401079	0.000674549	0.00137285	0.000491462		3.46791	76.0553	20.4768
B16DD067-PH-PYRX1R	53.9461	0.2158	0.8366	17.6551	0.377354	0.4448	24.3124	2.0867	0.0777	0.0313	0.0104	0.0453	100.04		151.996	576.442		1.97548	0.00594472	0.0245232	0.0115812	0.540657	0.0103985	0.0137953	1.32714	0.081868	0.00551622	0.00146206	0.000301086	0.00133432		4.14761	67.2358	28.6166
B16DD067-PH-PYRX2C	53.2549	0.3302	1.8474	6.52877	0.587011	0.2209	16.9502	20.1342	0.2443	0.0232	0.2186	0.0049	100.345		3194.84	62.3525		1.94917	0.0090915	0.0508276	0.0288583	0.19983	0.0161676	0.00684764	0.92479	0.789527	0.0173349	0.00108315	0.00632537	0.000144257		40.7569	47.7394	11.5037
B16DD067-PH-PYRX2R	52.235	0.3075	1.5917	9.97334	1.06025	0.2978	15.7008	18.3161	0.1955	0.0335	0.0108	0.001	99.7233		157.842	12.725		1.94922	0.00863203	0.0507781	0.0192208	0.311229	0.0297727	0.00941194	0.873371	0.732276	0.0141434	0.00159461	0.000318617	3.00159e-05		37.4363	44.6495	17.9142
B16DD067-PH-PYRX16C*	55.4273	0.1075	0.9157	8.36698	3.41993	0.2879	31.09	1.6351	0.0024	0.0287	0.067	0.0367	101.385		979.205	467.008		1.93427	0.00282208	0.0376597	0	0.244175	0.0898088	0.00850922	1.6173	0.0611336	0.000162373	0.00127757	0.00184847	0.00103017		3.02502	80.0277	16.9473
B16DD067-PH-PYRX16R*	53.9385	0.2052	2.5611	8.87612	3.22208	0.3281	29.6878	1.731	0.0196	0.0377	0.1284	0.0461	100.782		1876.57	586.622		1.89975	0.00543679	0.100253	0.0060517	0.261432	0.0853968	0.00978718	1.55866	0.0653185	0.00133832	0.00169374	0.00357525	0.00130602		3.29792	78.6966	18.0055
B16DD067-PH-PYRX17C*	53.6493	0.247	2.0743	9.87503	3.47801	0.3564	28.3902	2.5302	0.0322	0.0006	0.0786	0.0489	100.761		1148.74	622.252		1.90495	0.00659758	0.0868004	0	0.293223	0.0929305	0.010718	1.50268	0.0962536	0.00221658	2.71757e-05	0.00220642	0.00139663		4.8228	75.2919	19.8853
B16DD067-PH-PYRX17R*	53.5955	0.2072	1.6844	11.6205	2.4934	0.36	27.9139	1.7845	0.018	0.0261	0.0343	0.0292	99.767		501.294	371.57		1.92658	0.00560294	0.0713565	0	0.34932	0.0674464	0.0109601	1.49574	0.0687253	0.00125441	0.00119676	0.000974759	0.000844291		3.44973	75.0801	21.4701
B16DD067-PH-PYRX18C*	52.7631	0.3074	2.489	4.01084	1.93029	0.1738	17.4137	21.1087	0.2182	0.0103	0.2085	0.0197	100.654		3047.23	250.682		1.91741	0.00840344	0.0825883	0.0240075	0.121888	0.0527856	0.00534921	0.943308	0.821843	0.0153726	0.000477454	0.00599013	0.000575841		42.2504	48.4948	9.25482
B16DD067-PH-PYRX18R*	51.6076	0.4154	3.4052	3.85364	2.72098	0.1489	16.9943	20.8382	0.2005	0.0235	0.1301	0.0314	100.37		1901.41	399.565		1.88462	0.0114115	0.115383	0.0311657	0.117685	0.0747726	0.00460531	0.925103	0.815289	0.0141949	0.00109468	0.00375605	0.000922338		42.0804	47.7484	10.1712
B16DD067-PH-PYRX19C*	55.1324	0.1483	1.4771	8.19097	3.34149	0.2532	30.9193	1.7005	0.018	0.0153	0.1643	0.0659	101.427		2401.24	838.577		1.92245	0.00389007	0.0607	0	0.238849	0.0876794	0.00747768	1.60715	0.0635283	0.00121683	0.000680533	0.0045293	0.00184835		3.169	80.1697	16.6613
B16DD067-PH-PYRX19R*	54.6193	0.2277	2.0103	9.04583	2.43671	0.2969	29.3957	2.6554	0.0318	0.0219	0.1796	0.0545	100.976		2624.85	693.513		1.9207	0.00602344	0.079299	0.00401242	0.266012	0.0644801	0.00884257	1.5409	0.100043	0.00216795	0.000982351	0.00499304	0.00154156		5.05195	77.8123	17.1357
B16DD067-PH-PYRX20C*	54.1208	0.1994	1.5645	10.1407	3.15161	0.3471	28.658	2.403	0.0174	0.0157	0.0853	0.0395	100.743		1246.66	502.637		1.92076	0.00532356	0.0654356	0	0.300966	0.0841685	0.0104332	1.51611	0.0913702	0.0011972	0.000710751	0.00239333	0.00112761		4.56155	75.6902	19.7482
B16DD067-PH-PYRX20R*	52.7574	0.2929	0.7799	17.8355	1.6791	0.5355	23.6237	2.0412	0.0304	0.011	---	0.0255	99.6034		---	324.488		1.95367	0.00815933	0.0340358	0	0.55232	0.0467898	0.016795	1.30404	0.0809831	0.00218247	0.000519599	---	0.000759553		4.04727	65.1718	30.7809
db5
Groundmass
B16DD063-GM-PYRX8	53.0746	0.2488	1.2714	16.8101	0.912537	0.525	24.272	2.1548	0.0376	0.0344	0.072	0.015	99.4281		1052.28	190.875		1.95442	0.00689209	0.0455767	0.00959856	0.517656	0.0252866	0.0163737	1.33234	0.0850122	0.00268428	0.00161585	0.00209609	0.000444298		4.30078	67.4033	28.2959
B16DD063-GM-PYRX9	53.7805	0.1303	0.6869	16.968	1.29424	0.4426	24.9246	1.7496	0.0524	0.0323	0.0499	0	100.111		729.288	0		1.96571	0.00358268	0.0295882	0	0.518639	0.0355975	0.0137013	1.358	0.0685135	0.00371309	0.00150594	0.00144192	0		3.4352	68.089	28.4758
B16DD063-GM-PYRX10	53.928	0.1008	0.5514	16.0749	2.34716	0.4111	25.5832	1.6728	0.052	0.0215	0.0515	0.0118	100.806		752.672	150.155		1.95538	0.00274945	0.0235621	0	0.487422	0.0640424	0.0126246	1.38277	0.0649834	0.00365534	0.000994407	0.00147628	0.000344152		3.23005	68.7315	28.0385
B16DD063-GM-PYRX11	53.6695	0.1092	0.7478	16.9197	2.17478	0.5214	24.8834	1.7852	0.0159	0.023	0.0131	0.0146	100.878		191.457	185.785		1.95254	0.00298858	0.0320619	0	0.514762	0.0595385	0.0160657	1.34946	0.0695829	0.00112145	0.00106736	0.000376782	0.000427246		3.46285	67.1571	29.38
B16DD063-GM-PYRX13	53.1504	0.2024	1.2569	17.3978	2.05803	0.4584	24.3263	1.8188	0.0231	0.0255	0	0	100.718		0	0		1.94054	0.00555898	0.0540813	0	0.53119	0.0565426	0.0141748	1.32394	0.0711448	0.00163507	0.00118759	0	0		3.56259	66.2968	30.1406
B16DD063-GM-PYRX14	53.1749	0.2149	0.8408	15.5715	1.46449	0.5079	25.2174	1.9058	0.05	0.0148	0.059	0.0086	99.0301		862.285	109.435		1.95706	0.0059498	0.0364687	0	0.479256	0.0405594	0.0158318	1.38349	0.075148	0.0035676	0.000694814	0.0017167	0.000254594		3.76817	69.3727	26.8591
B16DD063-GM-PYRX15	53.1108	0.2753	1.1524	15.7775	2.8935	0.4695	25.1593	1.7448	0.0791	0.0055	0.0171	0.0134	100.698		249.917	170.515		1.93125	0.00753061	0.0493843	0	0.47977	0.0791749	0.0144593	1.36374	0.0679741	0.00557623	0.00025511	0.000491583	0.000391933		3.39003	68.013	28.597
B16DD064-GM-PYRX9	52.9015	0.216	1.2519	17.527	1.54041	0.4362	24.1362	1.7659	0.0365	0.0065	0	0.0036	99.8217		0	45.81		1.9471	0.00598055	0.0529025	0.00139992	0.539468	0.0426643	0.0135975	1.32424	0.0696351	0.00260448	0.00030517	0	0.000106579		3.49995	66.5579	29.9422
B16DD064-GM-PYRX10	53.5457	0.179	1.1546	15.723	1.80632	0.4286	25.5222	1.7846	0.0449	0.0149	0	0	100.204		0	0		1.94757	0.00489766	0.0494913	0	0.478236	0.0494392	0.0132031	1.38377	0.0695425	0.00316608	0.000691294	0	0		3.48726	69.39	27.1227
B16DD064-GM-PYRX11	52.9781	0.2458	1.1236	16.1498	1.71702	0.5046	24.7193	1.8287	0.0756	0.0111	0.0198	0.0421	99.4156		289.377	535.722		1.94899	0.00680241	0.0487141	0	0.496845	0.0475331	0.0157222	1.35558	0.0720771	0.00539191	0.000520888	0.000575868	0.00124579		3.62604	68.1965	28.1774
B16DD064-GM-PYRX12	53.1263	0.1417	0.6811	15.3334	2.93607	0.4737	25.4155	1.6717	0.068	0.0269	0.0297	0	99.9041		434.066	0		1.94361	0.00389976	0.0293657	0	0.469113	0.0808304	0.0146777	1.38604	0.065524	0.004823	0.00125534	0.000859016	0		3.2499	68.7457	28.0044
B16DD064-GM-PYRX13	52.8563	0.2309	1.2188	16.3757	2.72745	0.4321	24.7474	1.7041	0.0544	0.0161	0	0.0009	100.364		0	11.4525		1.93221	0.00634965	0.0525074	0	0.500608	0.0750278	0.0133782	1.34854	0.0667413	0.00385536	0.000750745	0	2.64638e-05		3.32991	67.2826	29.3875
B16DD064-GM-PYRX14	53.1815	0.1825	0.8356	16.472	2.34358	0.3812	24.9823	1.6938	0.0335	0.0111	0	0.0034	100.121		0	43.265		1.94623	0.00502418	0.0360382	0	0.504105	0.064539	0.0118152	1.36284	0.0664108	0.00237677	0.000518163	0	0.000100084		3.3045	67.8127	28.8828
B16DD064-GM-PYRX15	52.447	0.1677	1.2101	14.8532	4.51348	0.5037	25.2273	1.7435	0.0467	0.0093	0	0.0197	100.742		0	250.682		1.91003	0.00459432	0.0519364	0	0.452354	0.123691	0.0155363	1.36952	0.0680275	0.0032972	0.000432028	0	0.000577082		3.35254	67.493	29.1545
B16DD063-GM-PYRX12	51.4848	0.2573	1.7064	7.15074	2.74176	0.2982	15.9338	19.4335	0.207	0.0278	0.0021	0	99.2434		30.6915	0		1.92474	0.00723604	0.0751803	0	0.223555	0.0771313	0.00944182	0.887953	0.778371	0.0150028	0.00132571	6.20665e-05	0		39.3822	44.9266	15.6911
B16DD064-GM-PYRX7	51.9603	0.4127	1.5218	7.7917	2.74002	0.2547	15.1616	20.43	0.2368	0.0214	0.0226	0.0321	100.586		330.299	408.472		1.92666	0.0115116	0.0664998	0	0.241604	0.076453	0.00799864	0.838021	0.811602	0.0170225	0.00101217	0.0006625	0.00095739		41.0796	42.4169	16.5035
B16DD064-GM-PYRX8	51.5486	0.3832	1.3804	7.35327	3.1299	0.2865	15.3684	19.8808	0.2678	0.0293	0.0074	0.051	99.6866		108.151	648.975		1.92664	0.010774	0.060802	0	0.229828	0.088028	0.00906905	0.856227	0.796083	0.0194045	0.00139688	0.000218655	0.00153322		40.2218	43.2605	16.5177
Phenocryst Cores & Rims
B16DD063-PH-PYRX1C	54.8466	0.1191	1.0255	12.5807	0.613723	0.3965	28.315	1.5037	0.0223	0.0125	0.0534	0.059	99.5481		780.441	750.775		1.96881	0.00321613	0.0311887	0.0121943	0.377659	0.0165781	0.0120546	1.51512	0.0578306	0.00155191	0.000572365	0.00151545	0.00170356		2.92185	76.5506	20.5276
B16DD063-PH-PYRX1R	53.6656	0.0907	0.7029	15.7757	2.69501	0.3786	25.7019	1.4027	0.056	0.0124	0.0921	0.0648	100.638		1346.04	824.58		1.9485	0.0024773	0.0300765	0	0.478996	0.0736329	0.0116423	1.39106	0.0545645	0.00394185	0.000574294	0.00264368	0.00189247		2.71479	69.2106	28.0746
B16DD063-PH-PYRX2C	52.9339	0.2554	1.4893	16.8527	0	0.4444	23.6874	2.4659	0.059	0.0252	0.0339	0.02	98.2671		495.449	254.5		1.96978	0.00714946	0.0302159	0.0350967	0.524437	0	0.014006	1.31395	0.098311	0.00425642	0.00119617	0.000997307	0.00059864		5.03976	67.3578	27.6025
B16DD063-PH-PYRX2R	54.0547	0.1596	1.2616	12.4511	2.58317	0.3615	27.7586	1.619	0.0587	0.0278	0.0297	0.0185	100.384		434.066	235.412		1.93702	0.0043023	0.0532785	0	0.37312	0.0696563	0.0109714	1.48277	0.0621568	0.00407799	0.00127073	0.000841398	0.00053324		3.1099	74.1877	22.7024
B16DD063-PH-PYRX3C	53.0469	0.2348	1.2008	16.8315	1.34037	0.5144	24.3007	1.926	0.0761	0.0289	0.0506	0.0233	99.5744		739.519	296.493		1.95225	0.0065004	0.0477538	0.00432664	0.518007	0.0371199	0.0160336	1.33312	0.0759403	0.00542959	0.00135669	0.00147221	0.000689734		3.83494	67.3218	28.8432
B16DD063-PH-PYRX3R	52.6801	0.2133	1.1837	18.7317	1.39259	0.4999	23.1166	1.9158	0.0333	0.0362	0.0573	0.0082	99.8687		837.439	104.345		1.95029	0.00594035	0.0497051	0.00193955	0.579922	0.0387957	0.0156744	1.27572	0.0759881	0.00239005	0.00170951	0.00167708	0.000244185		3.826	64.2324	31.9416
B16DD063-PH-PYRX4C	53.0246	0.173	1.5136	5.1151	1.02295	0.191	16.8943	21.1314	0.1979	0.0142	0.1373	0.0367	99.452		2006.64	467.008		1.95463	0.00479735	0.0453699	0.0203851	0.157682	0.0283758	0.00596315	0.928336	0.834561	0.014143	0.000667705	0.00400132	0.00108819		42.6903	47.4872	9.82245
B16DD063-PH-PYRX4R	51.7582	0.5045	1.7957	7.4517	2.46498	0.3222	16.129	19.2534	0.2242	0.0138	0.0417	0.0242	99.9836		609.446	307.945		1.92073	0.0140837	0.0785329	0	0.23125	0.068835	0.0101267	0.892222	0.765486	0.0161299	0.000653245	0.0012234	0.000722361		38.8982	45.3383	15.7634
B16DD063-PH-PYRX5C	52.4293	0.3297	1.8745	4.25502	2.63476	0.1835	17.0327	21.2355	0.1766	0.0153	0.1153	0.0409	100.323		1685.11	520.452		1.92031	0.00908417	0.0796865	0.00122567	0.130328	0.0726186	0.00569232	0.929949	0.833303	0.01254	0.000714823	0.00333866	0.00120496		42.2591	47.1603	10.5807
B16DD063-PH-PYRX5R	51.6733	0.3159	1.8082	7.31654	2.79254	0.2621	15.34	20.0365	0.2987	0.0183	0.0373	0.0134	99.9128		545.139	170.515		1.92345	0.00884569	0.0765522	0.00276921	0.22775	0.0782208	0.00826296	0.851171	0.799057	0.0215555	0.000868908	0.00109766	0.000401208		40.6756	43.3284	15.9959
B16DD063-PH-PYRX6C	52.3435	0.214	1.4117	16.4372	1.5233	0.494	24.1765	1.9377	0.0369	0.0065	0.0435	0.0273	98.652		635.753	347.392		1.94351	0.00597733	0.0564857	0.00528715	0.510377	0.0425617	0.0155348	1.33812	0.0770821	0.00265619	0.000307856	0.00127691	0.000815341		3.88582	67.4566	28.6576
B16DD063-PH-PYRX6R	52.4636	0.2369	1.7464	16.7142	2.51304	0.4735	24.2043	1.7773	0.037	0.0309	0.0599	0.0235	100.28		875.439	299.038		1.92295	0.00653197	0.0754371	0	0.512312	0.0693135	0.0146989	1.32246	0.0697933	0.00262919	0.0014447	0.00173573	0.000692836		3.50972	66.5027	29.9876
B16DD063-PH-PYRX7C	52.7007	0.1976	1.8689	16.0393	2.94936	0.4303	24.7642	1.8044	0.0453	0.0136	0.0131	0.0056	100.832		191.457	71.26		1.9161	0.0054045	0.0800787	0	0.48767	0.0806933	0.0132503	1.34215	0.0702871	0.00319306	0.000630738	0.000376545	0.000163772		3.52483	67.3078	29.1674
B16DD063-PH-PYRX7R	53.4935	0.1995	1.0862	16.596	2.17257	0.4595	25.0429	1.6669	0.0267	0.0212	0.0297	0.0423	100.837		434.066	538.267		1.94383	0.0054534	0.0465153	0	0.504312	0.059407	0.0141415	1.3565	0.0648945	0.00188094	0.000982655	0.000853213	0.00123637		3.24594	67.8502	28.9039
B16DD063-PH-PYRX16C*	53.1227	0.2055	2.4696	10.974	1.7685	0.3064	28.0011	1.9184	---	0.0073	0.0775	0.0167	98.8642		1132.66	212.507		1.91731	0.00557945	0.082692	0.0223513	0.33122	0.0480313	0.00936602	1.50648	0.074181	---	0.000336081	0.00221135	0.000484819		3.76691	76.4991	19.734
B16DD063-PH-PYRX16R*	53.5719	0.1756	1.8211	10.7091	2.71384	0.3459	28.5194	1.6113	0.0338	0.0096	0.0508	0.0253	99.5876		742.442	321.942		1.92155	0.00473813	0.0769802	0	0.321222	0.0732501	0.010508	1.52487	0.0619203	0.00235039	0.000439233	0.00144053	0.000729939		3.10881	76.5585	20.3327
B16DD063-PH-PYRX17C*	53.9549	0.1018	2.4128	8.73714	2.62195	0.256	29.7488	1.769	0.02	0.0313	0.3012	0.0457	100.001		4402.04	581.532		1.91049	0.00271163	0.0895067	0.0111786	0.258716	0.0698631	0.00767731	1.57022	0.0671096	0.00137294	0.00141373	0.00843169	0.00130161		3.40038	79.5618	17.0378
B16DD063-PH-PYRX17R*	53.4036	0.109	1.0558	15.0927	1.36522	0.3495	26.2038	1.2499	0.0209	0.0182	0.0695	0.0169	98.955		1015.74	215.052		1.95605	0.00300334	0.0439462	0.0016283	0.462292	0.037629	0.0108421	1.43071	0.0490487	0.00148411	0.000850336	0.00201252	0.000497907		2.46411	71.8761	25.6598
B16DD063-PH-PYRX18C*	53.4728	0.2261	2.4982	10.7767	2.22466	0.2881	27.9851	2.2736	0.0159	0.0318	0.0469	0.0381	99.878		685.444	484.823		1.91302	0.00608491	0.0869839	0.0183439	0.322413	0.0598904	0.00872938	1.49242	0.0871449	0.00110279	0.00145118	0.00132649	0.00109638		4.42226	75.7343	19.8434
B16DD063-PH-PYRX18R*	50.9037	0.3707	0.9762	20.1323	0.308424	0.5182	18.3336	5.6284	0.106	0.0414	0.0087	0.0133	97.3409		127.15	169.242		1.96777	0.0107799	0.0322289	0.0122439	0.650815	0.00897185	0.0169659	1.05645	0.233105	0.007944	0.00204143	0.000265882	0.00041355		11.855	53.7277	34.4174
B16DD063-PH-PYRX19C*	53.3147	0.1505	0.68	16.589	1.03378	0.4449	24.9416	1.6697	0.0232	0.0377	0.0166	0.01	98.9116		242.609	127.25		1.96844	0.00418003	0.0295879	0	0.512193	0.0287218	0.0139121	1.3727	0.0660473	0.00166062	0.00177552	0.000484538	0.000296979		3.31301	68.8563	27.8307
B16DD063-PH-PYRX19R*	51.4071	0.2611	1.301	20.3509	1.00073	0.5129	21.2529	2.0098	0.0502	0.0334	0.04	0.0152	98.2352		584.6	193.42		1.95166	0.00745687	0.048336	0.00987288	0.646108	0.0285894	0.0164918	1.20276	0.0817479	0.00369483	0.00161747	0.00120057	0.00046417		4.13768	60.8777	34.9846
B16DD063-PH-PYRX20C*	52.819	0.2501	1.5686	5.30477	1.42327	0.2222	18.3355	18.9827	0.1726	0.0165	0.0653	0.0008	99.1613		954.359	10.18		1.94494	0.00692784	0.0550604	0.0130099	0.163351	0.0394378	0.0069297	1.00644	0.748886	0.0123215	0.000775013	0.00190096	2.3695e-05		38.1105	51.217	10.6725
B16DD063-PH-PYRX20R*	51.2128	0.4715	3.6231	5.13343	1.85617	0.2157	16.383	20.238	0.2188	0.0466	0.0932	0.0086	99.5009		1362.12	109.435		1.89016	0.0130909	0.109842	0.0477488	0.158441	0.051552	0.00674255	0.901344	0.800257	0.0156558	0.00219389	0.00271945	0.000255311		41.7162	46.9857	11.2981
B16DD063-PH-PYRX21C*	53.9321	0.1543	2.5254	9.60367	2.7455	0.2933	29.1587	1.9231	0.0349	0.0033	0.1074	0.041	100.523		1569.65	521.725		1.90766	0.00410569	0.0923444	0.0129276	0.284073	0.0730772	0.00878657	1.53744	0.072878	0.00239324	0.000148893	0.00300332	0.00116651		3.68768	77.7957	18.5167
B16DD063-PH-PYRX21R*	52.2883	0.3507	1.764	5.65703	2.00287	0.2221	17.1295	19.7512	0.2138	0.0075	0.0903	0.0373	99.5146		1319.73	474.642		1.93164	0.00974597	0.0683613	0.0084367	0.174763	0.0556778	0.00694904	0.943286	0.78173	0.0153122	0.00035342	0.00263727	0.00110836		39.8353	48.0678	12.0969
B16DD063-PH-PYRX22C*	51.742	0.3255	1.5638	7.02776	1.59464	0.2971	15.9288	19.6699	0.2516	0.0071	0.03	0.0192	98.4574		438.45	244.32		1.94313	0.00919555	0.056869	0.0123412	0.220707	0.0450641	0.00944966	0.891701	0.791413	0.018318	0.000340115	0.000890687	0.000579978		40.4125	45.5337	14.0538
B16DD063-PH-PYRX22R*	51.2657	0.4184	2.1463	6.2802	2.1397	0.2724	16.4286	19.45	0.1887	0.0206	0.0291	---	98.6339		425.297	---		1.91754	0.0117727	0.0824619	0.0121482	0.19644	0.0602252	0.00862937	0.915999	0.779433	0.0136835	0.000982864	0.000860508	---		39.7522	46.7173	13.5304
B16DD064-PH-PYRX1C	52.8049	0.2472	1.2233	17.2015	1.90089	0.4007	24.0909	2.0586	0.0339	0.0072	0	0	99.969		0	0		1.94173	0.00683805	0.0530126	0	0.528958	0.0525994	0.0124793	1.32052	0.0811016	0.00241671	0.00033772	0	0		4.0639	66.1697	29.7664
B16DD064-PH-PYRX1R	51.532	0.266	1.0511	24.1197	1.2901	0.6157	19.3851	1.8203	0.0335	0.025	0.0194	0	100.158		283.531	0		1.95211	0.00758014	0.0469247	0	0.764081	0.0367756	0.0197538	1.09464	0.0738776	0.00246026	0.00120803	0.000580998	0		3.71406	55.0313	41.2547
B16DD064-PH-PYRX3C	51.6492	0.3713	1.7625	7.63182	2.58987	0.3547	15.496	19.7637	0.2323	0.0208	0.0061	0.0077	99.886		89.1515	97.9825		1.92365	0.0104029	0.0763542	0.00100658	0.2377	0.0725851	0.0111886	0.860317	0.788628	0.0167733	0.000988175	0.000179612	0.000230677		40.0234	43.6617	16.315
B16DD064-PH-PYRX3R	54.4749	0.1158	1.3152	11.0778	3.15204	0.3795	28.9972	1.3995	0.0255	0.0197	0.0399	0.0428	101.04		583.139	544.63		1.92944	0.0030854	0.0548981	0	0.328118	0.0840108	0.0113842	1.53098	0.0531068	0.00175099	0.000890042	0.00111726	0.00121936		2.64529	76.2592	21.0955
B16DD064-PH-PYRX4C	51.6928	0.3966	2.1997	4.55839	3.38903	0.2584	16.8412	20.3938	0.2413	0.0181	0.0165	0.0102	100.016		241.148	129.795		1.90343	0.0109857	0.0954556	0	0.140365	0.0939055	0.00805852	0.924397	0.804541	0.0172256	0.00085015	0.000480327	0.000302106		40.8134	46.8935	12.2931
B16DD064-PH-PYRX4R	54.3182	0.1835	1.2201	11.142	2.93388	0.3517	28.7867	1.4206	0.0548	0.0022	0.028	0.0786	100.52		409.22	1000.18		1.93398	0.00491486	0.0511956	0	0.331748	0.0786064	0.0106056	1.52784	0.0541902	0.00378265	9.99169e-05	0.000788152	0.00225103		2.70547	76.2779	21.0166
B16DD064-PH-PYRX6C	50.7806	0.3672	1.172	9.81156	3.79791	0.3426	14.4162	18.4953	0.3124	0.0178	0.0061	0	99.5197		89.1515	0		1.92116	0.0104505	0.0522543	0	0.310415	0.108123	0.0109776	0.813004	0.749666	0.0229131	0.000859001	0.000182448	0		37.6303	40.8097	21.56
B16DD064-PH-PYRX6R	50.9269	0.4392	2.0629	6.82039	3.11887	0.2588	15.2166	20.16	0.2556	0.0174	0	0.0072	99.2838		0	91.62		1.90803	0.0123785	0.0910849	0	0.213691	0.0879314	0.00821215	0.849832	0.809227	0.0185655	0.000831565	0	0.000216981		41.1006	43.1629	15.7365
B16DD064-PH-PYRX16C*	53.2878	0.264	1.4832	17.4163	0.938282	0.3787	24.5971	1.6851	0.0031	0.0242	0.0126	0.0233	100.114		184.149	296.493		1.94904	0.0072638	0.0509646	0.0129679	0.532705	0.0258246	0.0117312	1.34108	0.0660328	0.000219817	0.00112906	0.00036434	0.000685487		3.33943	67.8212	28.8394
B16DD064-PH-PYRX16R*	54.2158	0.1595	1.1499	16.2265	1.03671	0.4257	25.8662	1.5618	0.0082	0.024	0.014	0.0339	100.722		204.61	431.377		1.95872	0.00433486	0.0412815	0.00767797	0.490243	0.0281845	0.0130258	1.39302	0.0604524	0.000574339	0.00110603	0.00039987	0.000985138		3.04558	70.1799	26.7745
B16DD064-PH-PYRX17C*	53.837	0.2027	0.8036	17.5813	0.886579	0.4512	24.8489	1.5921	0.0114	0.0304	---	0.015	100.25		---	190.875		1.96664	0.00557015	0.0333561	0.00123907	0.537076	0.0243708	0.0139595	1.3531	0.0623099	0.000807343	0.00141654	---	0.000440745		3.12987	67.9671	28.903
B16DD064-PH-PYRX17R*	52.4009	0.3662	1.2995	9.85061	1.64282	0.3118	15.2259	19.1245	0.2399	0.0155	---	0.0078	100.476		---	99.255		1.94771	0.0102393	0.0522922	0.00463128	0.306188	0.0459499	0.00981558	0.843617	0.761583	0.0172872	0.000734896	---	0.000233201		38.715	42.8852	18.3998
B16DD064-PH-PYRX18C*	53.5891	0.2044	0.8322	19.3756	0.566054	0.493	23.5638	1.7017	0.0105	0.0172	---	0.0369	100.383		---	469.553		1.97046	0.00565379	0.0295409	0.00652106	0.595781	0.0156624	0.015353	1.29156	0.0670372	0.000748495	0.00080673	---	0.00109136		3.37653	65.0531	31.5704
B16DD064-PH-PYRX18R*	53.111	0.2367	1.0937	18.8957	1.4019	0.47	23.4688	1.6779	0.0368	0.0299	---	0.0368	100.451		---	468.28		1.95357	0.00654952	0.0464347	0.000975537	0.581227	0.0388032	0.0146419	1.2868	0.0661229	0.00262422	0.00140289	---	0.00108879		3.32677	64.7416	31.9316
B16DD064-PH-PYRX19C*	53.4739	0.1783	0.8498	18.1061	0.890995	0.4373	24.2719	1.6739	0.0229	0.0035	---	0.01	99.913		---	127.25		1.96562	0.00493033	0.0343847	0.0024285	0.556573	0.0246456	0.0136142	1.32996	0.0659217	0.00163193	0.00016411	---	0.00029567		3.31146	66.8081	29.8804
B16DD064-PH-PYRX19R*	52.8504	0.2716	1.505	16.6877	1.81913	0.3873	24.6673	1.6906	0.0062	0.0348	0.0269	0.0319	99.9788		393.143	405.927		1.93652	0.00748639	0.0634763	0.00151294	0.51134	0.0501586	0.0120192	1.34733	0.0663678	0.000440428	0.00162653	0.000779241	0.000940192		3.33974	67.7999	28.8604
Phenocryst Transect 1
B16DD064-PH-PYRX5-C-R-Trans-1	54.3411	0.1164	0.6493	13.737	0.0242771	0.3764	27.2243	1.5845	0.0405	0.0137	0.032	0.0624	98.2018		467.68	794.04		1.98561	0.00319954	0.0143879	0.0135724	0.419755	0.000667532	0.0116485	1.48286	0.0620298	0.00286899	0.000638551	0.000924403	0.00183401		3.13763	75.0071	21.8553
B16DD064-PH-PYRX5-C-R-Trans-2	53.8567	0.1911	1.4066	14.0783	1.2552	0.3618	26.7721	1.6772	0.0373	0.028	0.018	0	99.6823		263.07	0		1.9494	0.00520343	0.050601	0.00940048	0.426139	0.0341888	0.0110913	1.44451	0.0650411	0.00261745	0.00129279	0.000515084	0		3.28329	72.9193	23.7974
B16DD064-PH-PYRX5-C-R-Trans-3	53.348	0.1902	1.0673	16.8916	1.40949	0.4641	24.7699	1.6542	0.0476	0.029	0.0158	0.0075	99.8947		230.917	95.4375		1.95464	0.00524238	0.0453556	0.000730161	0.517558	0.0388616	0.0144018	1.35286	0.0649351	0.00338115	0.00135537	0.000457669	0.000221036		3.26535	68.0301	28.7045
Phenocryst Transect 2
B16DD064-PH-PYRX2-C-R-Trans-1	52.5212	0.2293	1.5628	4.01493	2.8729	0.2216	16.9008	21.4798	0.2336	0.0143	0.0792	0	100.13		1157.51	0		1.92769	0.00633105	0.0675985	0	0.123231	0.0793473	0.00688855	0.924673	0.844648	0.0166221	0.000669497	0.00229812	0		42.6851	46.7293	10.5856
B16DD064-PH-PYRX2-C-R-Trans-2	52.0205	0.3124	1.3858	7.56222	2.30037	0.3059	15.7312	19.8049	0.2505	0.0129	0.0165	0	99.7032		241.148	0		1.9377	0.00875367	0.0608334	0	0.235559	0.0644787	0.0096504	0.873475	0.790362	0.0180895	0.000612929	0.000485893	0		40.0482	44.2596	15.6921
B16DD064-PH-PYRX2-C-R-Trans-3	51.9691	0.4042	1.5185	9.11008	0.297189	0.3069	15.3452	19.3726	0.1962	0.0017	0.0247	0	98.5463		360.99	0		1.95747	0.0114529	0.0425307	0.0248747	0.286953	0.00842347	0.00979043	0.861589	0.781772	0.0143271	8.16785e-05	0.000735516	0		40.1211	44.2174	15.6614
B16DD064-PH-PYRX2-C-R-Trans-4	51.3347	0.3567	1.8835	7.14845	3.18093	0.2898	15.2018	20.0327	0.3127	0.0128	0.0164	0.0047	99.7752		239.686	59.8075		1.91543	0.0100121	0.0828231	0	0.223053	0.0893137	0.00915817	0.845529	0.800825	0.02262	0.000609221	0.000483776	0.00014106		40.6948	42.9665	16.3386
B16DD064-PH-PYRX2-C-R-Trans-5	50.8955	0.4562	1.9652	7.67636	3.24848	0.2528	14.4109	20.4751	0.2927	0.0204	0.0266	0	99.7203		388.759	0		1.9086	0.0128694	0.0868507	0	0.240731	0.0916695	0.00802912	0.805573	0.82263	0.0212798	0.000975833	0.000788611	0		41.7869	40.9204	17.2927
B16DD064-PH-PYRX2-C-R-Trans-6	52.225	0.2507	1.8251	5.25653	1.96142	0.2248	15.9748	21.5087	0.2238	0.0073	0.0414	0.0349	99.5345		605.061	444.102		1.93448	0.00698568	0.0655156	0.014156	0.162826	0.0546719	0.00705241	0.882062	0.853577	0.0160714	0.00034492	0.00121236	0.00103983		43.5456	44.9988	11.4556
B16DD064-PH-PYRX2-C-R-Trans-7	51.7156	0.3276	2.1576	4.56292	3.20663	0.2215	15.9838	21.5215	0.2587	0.0069	0.0186	0.0224	100.004		271.839	285.04		1.90924	0.00909809	0.0907618	0.00311084	0.140871	0.0890831	0.00692575	0.879621	0.851241	0.0185158	0.000324935	0.00054287	0.000665177		43.2598	44.7021	12.0381
B16DD064-PH-PYRX2-C-R-Trans-8	52.0082	0.3237	2.0093	4.3432	2.8416	0.2294	16.2391	21.5886	0.233	0.0208	0.0785	0.0549	99.9703		1147.28	698.602		1.91726	0.00897677	0.0827385	0.00455545	0.133893	0.0788279	0.00716238	0.892378	0.85266	0.0166523	0.000978097	0.00228783	0.00162792		43.3941	45.4155	11.1904
db6
Groundmass
B16DD060A-GM-PYRX8	53.806	0.1797	0.6783	16.1268	1.62487	0.5004	25.5522	1.6709	0.0289	0.015	0.0567	0.0005	100.24		828.67	6.3625		1.95884	0.00492134	0.0291018	0	0.490969	0.0445138	0.0154291	1.38667	0.0651719	0.00203974	0.000696575	0.00163191	1.46416e-05		3.25411	69.2382	27.5077
B16DD060A-GM-PYRX9	53.6241	0.1984	0.6172	16.8815	1.31089	0.488	24.8708	1.6949	0.0608	0.0349	0	0.0117	99.7933		0	148.882		1.96643	0.00547302	0.0266731	0	0.517689	0.0361735	0.0151563	1.35952	0.0665892	0.00432244	0.0016325	0	0.000345108		3.33759	68.142	28.5204
B16DD060A-GM-PYRX10	52.7128	0.2703	1.1252	17.2711	1.552	0.4328	24.1831	1.6851	0.0526	0.019	0.0348	0	99.3388		508.602	0		1.94822	0.00751513	0.0490097	0	0.533804	0.0431641	0.0135477	1.33233	0.0667252	0.00376892	0.000895746	0.00101683	0		3.35375	66.9657	29.6806
B16DD060A-GM-PYRX11	53.0195	0.1587	0.5286	19.2884	1.10823	0.4977	23.0629	1.657	0.0811	0.0346	0.0484	0.0126	99.4978		707.366	160.335		1.97188	0.00444006	0.0231687	0	0.599902	0.0310157	0.0156771	1.27861	0.066025	0.00584754	0.00164146	0.0014231	0.000376935		3.3158	64.212	32.4722
B16DD060A-GM-PYRX12	52.6839	0.2865	1.2852	16.9666	1.57636	0.4872	23.9884	2.116	0.0405	0.026	0.0417	0.0205	99.5189		609.446	260.863		1.94427	0.00795375	0.0557291	0.000166809	0.523618	0.0437768	0.0152279	1.31965	0.0836637	0.00289763	0.00122394	0.00121663	0.000608533		4.21281	66.4497	29.3375
B16DD060A-GM-PYRX13	52.5646	0.2349	1.1097	16.2429	2.50039	0.5308	24.4436	1.7574	0.0608	0.0313	0.0625	0.0303	99.5691		913.438	385.567		1.9376	0.00651362	0.0482066	0	0.500696	0.0693563	0.0165713	1.34311	0.0694039	0.00434493	0.00147172	0.00182136	0.00089839		3.47168	67.1845	29.3438
B16DD060A-GM-PYRX14	53.5489	0.2452	0.5974	16.9608	1.90974	0.5176	24.7976	1.6747	0.0692	0.0237	0.0208	0.0098	100.376		303.992	124.705		1.95712	0.00674149	0.0257313	0	0.518387	0.052523	0.016022	1.351	0.0655762	0.00490322	0.0011049	0.000601001	0.000288101		3.27307	67.4317	29.2952
B16DD060A-GM-PYRX15	53.0734	0.3663	1.2522	17.182	1.38885	0.6072	24.1076	2.0737	0.0389	0.0317	0.0765	0.0317	100.23		1118.05	403.382		1.94564	0.0101016	0.0540991	0	0.526744	0.0383134	0.0188527	1.3174	0.0814468	0.00276468	0.00148236	0.00221714	0.000934753		4.10775	66.4429	29.4494
B16DD060B-GM-PYRX6	52.8467	0.2998	1.1711	18.5047	1.76776	0.4639	23.5243	1.7398	0.0531	0.0166	0.0198	0.0107	100.418		289.377	136.157		1.94416	0.00829686	0.0507736	0	0.569292	0.048938	0.0144542	1.29005	0.0685734	0.00378719	0.000778989	0.00057587	0.000316628		3.44363	64.7841	31.7722
B16DD060B-GM-PYRX8	52.8669	0.2327	1.2048	18.5488	1.4252	0.5332	23.3936	1.8347	0.0504	0.018	0.0218	0	100.13		318.607	0		1.9495	0.00645511	0.050501	0.00185713	0.571999	0.0395479	0.0166527	1.28592	0.0724847	0.00360312	0.000846683	0.000635537	0		3.64868	64.7295	31.6218
B16DD060B-GM-PYRX9	52.2249	0.3419	1.2476	16.7787	3.96812	0.5019	23.9033	1.9456	0.04	0.004	0	0.0598	101.016		0	760.955		1.91227	0.00941758	0.0538366	0	0.513771	0.109336	0.0155648	1.30469	0.0763252	0.00283949	0.000186828	0	0.00176126		3.77906	64.5986	31.6223
B16DD060B-GM-PYRX10	53.1117	0.1997	0.9185	17.6717	1.53292	0.5207	24.0824	1.6326	0.0672	0.0105	0	0.0447	99.7926		0	568.807		1.95724	0.00553604	0.0398898	0	0.544591	0.042509	0.0162516	1.32291	0.0644577	0.00480099	0.000493573	0	0.00132499		3.23791	66.4538	30.3083
B16DD060B-GM-PYRX11	52.5665	0.316	1.252	17.5889	2.6276	0.5507	23.6775	1.8457	0.0652	0.0177	0.0139	0.0243	100.546		203.148	309.217		1.9311	0.00873274	0.0542038	0	0.540347	0.0726377	0.0171342	1.29661	0.0726438	0.00464356	0.000829426	0.000403697	0.000718047		3.63333	64.8508	31.5159
B16DD060B-GM-PYRX12	52.5609	0.2678	1.1061	19.2175	0	0.5716	23.0225	1.5662	0.0279	0.0301	0.0459	0.002	98.4185		670.828	25.45		1.96954	0.00754884	0.0304623	0.0183834	0.602196	0	0.0181405	1.28597	0.0628768	0.00202681	0.00143872	0.00135975	6.02813e-05		3.19304	65.3047	31.5022
B16DD060B-GM-PYRX13	52.9242	0.2561	0.9431	18.3108	1.20196	0.5189	23.4209	2.0321	0.0543	0.0253	0.012	0	99.6997		175.38	0		1.95795	0.00712731	0.0411183	0	0.566494	0.0334615	0.0162587	1.29161	0.0805443	0.00389454	0.00119393	0.000350973	0		4.05079	64.9582	30.991
B16DD060B-GM-PYRX14	52.7671	0.1497	0.578	20.6742	1.68163	0.5313	22.2485	1.5964	0.0354	0.0087	0.0611	0.044	100.376		892.977	559.9		1.96153	0.00418622	0.0253215	0	0.642688	0.0470403	0.0167273	1.23285	0.0635794	0.0025512	0.000412535	0.00179564	0.00131564		3.17439	61.5537	35.2719
B16DD060B-GM-PYRX15	52.4273	0.1916	1.1927	18.4824	1.55706	0.563	23.1377	1.7055	0.0506	0.0156	0.0218	0.0352	99.3805		318.607	447.92		1.94964	0.00535996	0.0503551	0.00191576	0.574772	0.0435723	0.0177321	1.28262	0.0679504	0.00364802	0.00074	0.000640914	0.00105291		3.42036	64.562	32.0177
B16DD060C-GM-PYRX15	50.9223	0.285	0.5762	23.9319	1.04563	0.7988	16.9944	4.1943	0.1238	0.0297	0	0.0268	98.9288		0	341.03		1.96957	0.00829232	0.0262643	0	0.77407	0.0304332	0.0261671	0.979818	0.173806	0.00928308	0.00146531	0	0.000833775		8.75908	49.3786	41.8623
B16DD060C-GM-PYRX12	51.4538	0.2722	0.8557	25.5726	0.280867	0.6465	18.3778	1.7747	0.0711	0.0262	0.0356	0.036	99.4031		520.294	458.1		1.97262	0.00785023	0.0273788	0.0112826	0.819861	0.00810278	0.0209918	1.05026	0.0728942	0.0052845	0.00128126	0.001079	0.00111014		3.69625	53.2557	43.048
B16DD060C-GM-PYRX14	51.5503	0.3011	1.1353	23.4954	0.918455	0.5738	19.5198	1.9542	0.0491	0.0568	0.1	0.0482	99.7026		1461.5	613.345		1.95606	0.00859468	0.0439395	0.00682866	0.745545	0.0262251	0.0184402	1.10409	0.0794442	0.00361194	0.00274921	0.00299982	0.00147112		4.02505	55.9389	40.0361
B16DD061A-GM-PYRX10	52.9416	0.242	1.3586	15.8604	3.83822	0.4605	24.8988	1.912	0.0481	0.0225	0.0414	0.0258	101.65		605.061	328.305		1.9146	0.00658363	0.0579033	0	0.479662	0.104453	0.0141048	1.34227	0.0740818	0.00337237	0.00103794	0.00118366	0.000750503		3.67731	66.628	29.6947
B16DD061A-GM-PYRX11	52.4231	0.205	1.1938	15.3556	4.46181	0.464	24.7389	2.0987	0.0352	0.0168	0.0454	0.0158	101.054		663.521	201.055		1.90907	0.00561594	0.0512344	0	0.467633	0.12227	0.0143111	1.34294	0.0818828	0.00248514	0.000780402	0.00130708	0.000462816		4.03554	66.1861	29.7783
B16DD061A-GM-PYRX12	52.992	0.2571	0.9272	15.766	3.71873	0.4354	25.3032	1.64	0.0247	0.019	0	0.0052	101.088		0	66.17		1.92381	0.00702137	0.0396694	0	0.478645	0.101591	0.0133874	1.36932	0.0637878	0.00173843	0.000879862	0	0.000151847		3.14733	67.563	29.2897
B16DD061A-GM-PYRX13	53.4029	0.1042	0.6584	16.0388	3.2739	0.4251	25.2262	1.736	0.0337	0.0064	0.0453	0.0407	100.992		662.059	517.907		1.94018	0.00284782	0.0281901	0	0.48729	0.0895057	0.0130804	1.36617	0.0675723	0.00237364	0.000296596	0.00130113	0.00118938		3.33917	67.5113	29.1495
B16DD061A-GM-PYRX14	53.0952	0.1712	0.6675	14.5556	4.55662	0.5093	25.7339	1.7211	0.0748	0.0286	0	0.022	101.136		0	279.95		1.92293	0.00466422	0.0284898	0	0.440837	0.124182	0.015622	1.38928	0.0667814	0.00525191	0.00132124	0	0.000640887		3.2789	68.2123	28.5089
B16DD061A-GM-PYRX15	52.2273	0.2863	1.4192	16.0295	3.55266	0.4695	24.385	1.764	0.0729	0.0254	0	0.022	100.254		0	279.95		1.91621	0.00790196	0.0613648	0	0.49182	0.0980862	0.0145893	1.33366	0.0693404	0.00518539	0.00118874	0	0.000649261		3.45407	66.4341	30.1119
B16DD061B-GM-PYRX11	52.431	0.234	1.4414	15.3137	4.39334	0.442	24.9688	1.7432	0.0519	0.0332	0	0.022	101.075		0	279.95		1.90588	0.0063987	0.0617479	0	0.465507	0.120174	0.0136077	1.35295	0.0678886	0.00365749	0.00153941	0	0.000643253		3.36061	66.9735	29.6658
B16DD061B-GM-PYRX12	53.3574	0.0707	0.7522	14.853	1.17652	0.3927	25.8229	1.6725	0.0751	0.0218	0.089	0.0105	98.2943		1300.74	133.613		1.96758	0.00196122	0.032418	0.000270963	0.458028	0.0326473	0.0122646	1.41945	0.0660764	0.00536892	0.00102542	0.00259462	0.000311443		3.32298	71.3842	25.2928
B16DD061B-GM-PYRX13	53.3229	0.0186	0.6191	12.2285	4.13584	0.378	27.356	1.5326	0.0585	0.025	0.0454	0.033	99.7535		663.521	419.925		1.93281	0.000507173	0.0264464	0	0.370669	0.11281	0.0116044	1.47811	0.0595177	0.00411092	0.00115591	0.001301	0.000962144		2.928	72.7161	24.3559
B16DD061B-GM-PYRX14	52.6586	0.2483	1.4736	15.4282	3.49618	0.4045	25.1041	1.6892	0.0552	0.0306	0.0059	0.0321	100.627		86.2285	408.472		1.91721	0.00680055	0.0632279	0	0.469735	0.0957859	0.012473	1.36245	0.0658904	0.00389625	0.00142112	0.000169823	0.00094006		3.28411	67.9075	28.8084
B16DD061B-GM-PYRX15	53.0933	0.1788	0.6091	15.1384	4.1589	0.5758	25.2637	1.9734	0.0572	0.0144	0.0387	0.02	101.122		565.601	254.5		1.92765	0.00488342	0.026062	0	0.45963	0.113625	0.0177058	1.3673	0.0767619	0.00402618	0.000666899	0.00111082	0.000584076		3.77205	67.1884	29.0396
B16DD060B-GM-PYRX7	51.7685	0.3486	1.2744	9.07667	2.385	0.3739	15.0714	19.1776	0.2708	0.0239	0.029	0	99.7997		423.835	0		1.93843	0.0098193	0.0562368	0	0.284217	0.0672019	0.0118576	0.841232	0.769345	0.0196581	0.00114154	0.000858476	0		38.9768	42.6187	18.4044
B16DD060C-GM-PYRX13	51.2445	0.3978	1.1497	12.4758	2.08737	0.4737	13.4698	17.9686	0.2812	0.0431	0	0.0743	99.6659		0	945.467		1.94673	0.0113682	0.0514723	0	0.396339	0.0596714	0.0152411	0.762777	0.731333	0.0207101	0.00208855	0	0.00227038		37.2111	38.811	23.9779
Phenocryst Cores & Rims
B16DD060A-GM-PYRX1C	52.959	0.2987	1.1652	17.0944	1.61224	0.629	24.1821	1.9409	0.0317	0.0237	0.0434	0.0189	99.9992		634.291	240.502		1.94584	0.00825603	0.0504543	0	0.525246	0.0445764	0.0195737	1.32446	0.0764035	0.00225806	0.00111077	0.00126067	0.000558574		3.83887	66.5471	29.614
B16DD060A-GM-PYRX1R	53.4249	0.1171	0.6215	18.0849	1.35168	0.4775	24.1013	1.6567	0.0472	0.0361	0	0.0034	99.9222		0	43.265		1.96718	0.00324358	0.0269694	0	0.556871	0.0374527	0.0148911	1.32287	0.0653561	0.00336938	0.00169557	0	0.0001007		3.27199	66.2283	30.4998
B16DD060A-GM-PYRX2C	53.9291	0.2179	0.7444	15.6055	1.49318	0.6171	25.7371	1.7093	0.0371	0.0159	0.0567	0.0577	100.221		828.67	734.232		1.96023	0.0059581	0.0318874	0	0.474352	0.0408416	0.0189974	1.39451	0.0665646	0.00261436	0.000737206	0.00162934	0.00168698		3.33613	69.8909	26.773
B16DD060A-GM-PYRX2R	53.4404	0.2975	1.0841	17.1539	0.948593	0.4839	24.7961	1.6366	0.0306	0.0293	0.0845	0	99.9855		1234.97	0		1.95591	0.00819096	0.044087	0.00267352	0.525028	0.0261257	0.015	1.35282	0.0641748	0.00217125	0.00136791	0.00244502	0		3.236	68.2158	28.5482
B16DD060A-GM-PYRX3C	52.3957	0.3032	1.6722	16.9603	1.78162	0.5055	24.0021	1.7861	0.0461	0.0254	0	0.0317	99.51		0	403.382		1.93367	0.0084175	0.0663326	0.00639587	0.52343	0.0494778	0.0158002	1.32042	0.070621	0.00329834	0.00119572	0	0.000941014		3.56716	66.6964	29.7365
B16DD060A-GM-PYRX3R	52.4375	0.1978	0.6317	19.3836	1.49135	0.504	22.6807	1.6669	0.0437	0.0196	0	0.0561	99.1129		0	713.872		1.96323	0.00557087	0.0278721	0	0.60688	0.0420161	0.0159814	1.26579	0.0668622	0.00317189	0.000936039	0	0.00168944		3.34724	63.3678	33.285
B16DD060A-GM-PYRX4C	50.4673	0.4961	1.8997	7.60875	2.86907	0.4803	14.8021	19.2322	0.3445	0.0203	0.1014	0.0056	98.3274		1481.96	71.26		1.91425	0.0141555	0.0849186	0	0.241346	0.0818911	0.0154296	0.836931	0.781554	0.0253329	0.000982184	0.00304068	0.000170855		39.9332	42.7627	17.3041
B16DD060A-GM-PYRX4R	51.649	0.347	1.8009	20.4994	1.26452	0.5359	21.6646	1.7131	0.0192	0.0298	0.1031	0.0137	99.6402		1506.81	174.333		1.933	0.00976941	0.0669963	0.0124348	0.641582	0.0356128	0.0169867	1.20865	0.0686904	0.00139309	0.00142264	0.00305053	0.000412423		3.48414	61.3054	35.2105
B16DD060A-GM-PYRX5C	53.3459	0.1728	0.6303	17.6399	1.18418	0.4813	24.5494	1.5757	0	0.0133	0	0	99.5928		0	0		1.96542	0.00478924	0.0273673	0	0.543489	0.0328307	0.0150185	1.34826	0.0621972	0	0.000625051	0	0		3.10707	67.3525	29.5404
B16DD060A-GM-PYRX5R	52.7113	0.2528	1.2803	16.2435	2.53693	0.5983	24.198	2.2306	0.0694	0.0294	0	0.0026	100.153		0	33.085		1.93357	0.00697591	0.0553474	0	0.498281	0.0700281	0.0185879	1.32316	0.0876636	0.00493541	0.00137566	0	7.6715e-05		4.38818	66.2335	29.3784
B16DD060A-GM-PYRX6C	52.0291	0.3045	1.4334	16.263	2.82635	0.5286	24.1871	1.7495	0.0679	0.0071	0	0	99.3966		0	0		1.92359	0.00846878	0.0624544	0	0.502814	0.078632	0.0165519	1.33299	0.0692982	0.0048668	0.000334837	0	0		3.46441	66.64	29.8956
B16DD060A-GM-PYRX6R	52.3483	0.251	1.1094	20.4346	1.69823	0.5859	21.9475	1.8017	0.0596	0.0293	0.0206	0	100.286		301.069	0		1.94743	0.00702426	0.0486381	0	0.635718	0.0475406	0.0184602	1.21709	0.0718097	0.00429846	0.00139039	0.000605858	0		3.60741	61.1412	35.2514
B16DD060A-GM-PYRX7C	52.9343	0.2592	1.2944	16.8962	2.20478	0.5279	24.3149	1.7274	0.0339	0.0199	0	0.1138	100.327		0	1448.1		1.93954	0.00714437	0.0558932	0	0.517714	0.0607903	0.016382	1.32804	0.0678103	0.00240807	0.000930085	0	0.00335393		3.4063	66.7109	29.8828
B16DD060A-GM-PYRX7R	52.8288	0.3214	1.2394	17.2462	1.42044	0.5543	24.0812	1.9066	0.0389	0.0332	0.1112	0.0016	99.7832		1625.19	20.36		1.94513	0.00890208	0.0537798	0	0.531019	0.0393558	0.0172853	1.3217	0.0752106	0.00277674	0.00155928	0.00323688	4.73859e-05		3.78977	66.5988	29.6115
B16DD060A-PH-PYRX16C*	55.1277	0.1127	0.8849	12.9847	1.209	0.3227	28.5334	1.3457	0.012	0.007	---	0.017	100.552		---	216.325		1.96334	0.00301937	0.0366624	0.000478223	0.386719	0.0324011	0.00973372	1.5148	0.051347	0.000828542	0.000318004	---	0.000486996		2.57378	75.9298	21.4964
B16DD060A-PH-PYRX16R*	52.2589	0.3809	1.7203	9.18751	1.01683	0.3075	14.9206	19.8595	0.255	0.0198	---	0.0183	99.9428		---	232.867		1.94755	0.0106784	0.0524488	0.0231061	0.286329	0.0285157	0.00970573	0.828881	0.792938	0.0184237	0.000941245	---	0.000548569		40.7393	42.586	16.6747
B16DD060A-PH-PYRX17C*	52.7303	0.308	1.3515	17.9877	1.57759	0.454	23.5569	2.0554	0.0199	0.0242	---	0.0327	100.09		---	416.108		1.94262	0.00853584	0.0573804	0.00129733	0.55417	0.0437352	0.0141657	1.29367	0.0811271	0.00142131	0.00113724	---	0.000969006		4.08317	65.111	30.8058
B16DD060A-PH-PYRX17R*	53.0143	0.2833	1.1389	18.6032	1.84145	0.5001	23.7861	1.5362	0.0184	0.0078	0.0039	0.0219	100.756		56.9985	278.677		1.94361	0.00781322	0.0492075	0	0.570351	0.0508023	0.0155284	1.29992	0.06034	0.0013078	0.00036477	0.000113038	0.000645819		3.02162	65.0955	31.8829
B16DD060A-PH-PYRX18C*	52.8829	0.2691	1.2252	18.5334	1.49292	0.5286	23.5458	1.7186	0.0363	0.0147	0.003	0.0086	100.259		43.845	109.435		1.94713	0.00745354	0.0528658	0.000298231	0.570657	0.0413641	0.016484	1.29232	0.067795	0.00259117	0.00069041	8.73266e-05	0.000254701		3.40914	64.9858	31.605
B16DD060A-PH-PYRX19C*	52.8896	0.2495	1.0069	18.9832	1.3522	0.5124	23.2563	1.5884	0.0653	0.0411	---	0.0172	99.9552		---	218.87		1.95622	0.00694202	0.0437813	0.000108545	0.58716	0.0376354	0.0160513	1.28223	0.0629432	0.0046824	0.00193909	---	0.000511713		3.16932	64.5628	32.2679
B16DD060A-PH-PYRX19R*	52.9198	0.2702	1.7073	16.1784	1.39565	0.4311	24.6319	2.0691	0.0542	0.0264	0.0122	0.0069	99.7032		178.303	87.8025		1.93902	0.00744761	0.0609812	0.012742	0.495724	0.0384813	0.0133782	1.34536	0.0812246	0.0038501	0.00123389	0.000353402	0.000203359		4.11437	68.1483	27.7374
B16DD060B-PH-PYRX1C	52.5833	0.1813	0.8972	17.3407	1.93518	0.5335	24.1048	1.4692	0.0437	0.0218	0.056	0.0147	99.1814		818.44	187.058		1.95004	0.0050578	0.0392116	0	0.537777	0.054004	0.0167565	1.33253	0.0583739	0.00314185	0.00103124	0.00164183	0.000438494		2.91951	66.6451	30.4354
B16DD060B-PH-PYRX1R	52.6747	0.219	1.2678	17.6458	2.48757	0.5413	23.6181	2.0252	0.0374	0.029	0.0579	0.0122	100.616		846.208	155.245		1.9337	0.00604782	0.0548489	0	0.54171	0.0687178	0.0168298	1.29243	0.079652	0.00266175	0.00135798	0.00168039	0.000360245		3.98391	64.6429	31.3732
B16DD060B-PH-PYRX2C	52.6743	0.31	1.2027	17.6986	2.31405	0.4581	23.6739	1.9899	0.0573	0.0269	0.01	0.0027	100.418		146.15	34.3575		1.93599	0.00857104	0.0520944	0	0.543979	0.0640007	0.01426	1.29704	0.0783569	0.00408288	0.00126115	0.000290569	7.98213e-05		3.92249	64.9286	31.1489
B16DD060B-PH-PYRX2R	51.9094	0.3014	0.9354	23.6534	2.29389	0.6793	20.0044	1.6226	0.0338	0.0284	0.0527	0.0078	101.523		770.21	99.255		1.94003	0.0084737	0.0411993	0	0.739258	0.0645124	0.021502	1.11446	0.0649704	0.00244899	0.00135391	0.0015571	0.000234481		3.2409	55.5923	41.1668
B16DD060B-PH-PYRX3C	53.8695	0.2119	1.6336	11.7462	3.05376	0.3571	28.1347	1.4876	0.0559	0.0163	0.0726	0.0466	100.686		1061.05	592.985		1.92161	0.00568618	0.0686748	0	0.350395	0.0819719	0.0107886	1.49603	0.0568525	0.00386582	0.000741683	0.0020474	0.00133708		2.84827	74.95	22.2017
B16DD060B-PH-PYRX3R	51.7057	0.1565	1.4308	20.7716	2.65714	0.4976	21.5556	1.4812	0.0534	0.0414	0.0784	0	100.429		1145.82	0		1.92863	0.0043913	0.0628955	0	0.647917	0.074582	0.0157197	1.19853	0.0591925	0.00386154	0.00196979	0.00231191	0		2.96564	60.0483	36.986
B16DD060B-PH-PYRX4C	51.9064	0.3715	1.2834	9.00409	2.4461	0.3008	15.3221	19.0898	0.2765	0.0088	0.0517	0.006	100.067		755.596	76.35		1.93665	0.0104269	0.0564314	0	0.280936	0.0686769	0.0095052	0.852169	0.763084	0.0200001	0.000418813	0.00152498	0.000180066		38.6495	43.1615	18.189
B16DD060B-PH-PYRX4R	51.9914	0.2828	1.3657	8.18654	2.57284	0.2927	15.1587	19.9707	0.2646	0.0267	0.0579	0.0098	100.18		846.208	124.705		1.9357	0.00792052	0.0599228	0	0.254886	0.0720821	0.00922962	0.84129	0.796603	0.0190987	0.00126802	0.00170424	0.000293484		40.3529	42.6166	17.0305
B16DD060C-PH-PYRX1C	52.8973	0.24	1.3747	15.6875	2.73094	0.4573	24.9833	1.7475	0.1112	0.0105	0.0585	0	100.299		854.978	0		1.92971	0.00658625	0.0591013	0	0.478578	0.0749687	0.0141291	1.35858	0.0682996	0.00786452	0.000488604	0.00168717	0		3.42429	68.1145	28.4612
B16DD060C-PH-PYRX1R	52.7031	0.2288	1.1732	15.6591	2.99534	0.4148	24.8904	1.9241	0.0159	0.0244	0	0.0582	100.087		0	740.595		1.92996	0.00630284	0.0506308	0	0.479533	0.0825405	0.0128649	1.3587	0.0754888	0.0011288	0.00113975	0	0.0017143		3.7573	67.6263	28.6164
B16DD060C-PH-PYRX2C	51.443	0.2572	1.4606	16.7048	2.71001	0.4143	23.7586	1.6989	0.0107	0.007	0.0073	0.0086	98.481		106.689	109.435		1.92318	0.00723322	0.0643509	0	0.522243	0.0762381	0.0131178	1.32401	0.068046	0.000775506	0.000333811	0.000215755	0.000258608		3.3961	66.0797	30.5242
B16DD060C-PH-PYRX2R	51.5624	0.2802	1.3997	22.1267	1.65948	0.6684	20.6893	1.6412	0	0.0193	0.0717	0.0229	100.141		1047.9	291.402		1.93771	0.00792121	0.0619898	0	0.695363	0.0469284	0.0212739	1.15899	0.0660783	0	0.000925171	0.0021302	0.000692217		3.3228	58.2807	38.3965
B16DD060C-PH-PYRX3C	52.6479	0.251	1.5837	16.1486	2.11918	0.4401	24.7063	1.7227	0.0477	0.0394	0.0732	0	99.7797		1069.82	0		1.93115	0.00692591	0.0684602	0	0.495346	0.0584941	0.0136723	1.35089	0.0676998	0.00339205	0.00184349	0.00212271	0		3.40867	68.0172	28.5742
B16DD060C-PH-PYRX3R	53.1817	0.2733	1.2034	16.8226	1.61518	0.4617	24.2821	2.2126	0.0745	0.0285	0	0	100.156		0	0		1.94756	0.00752897	0.0519359	0	0.515182	0.0445099	0.01432	1.32553	0.0868106	0.00528923	0.00133132	0	0		4.37035	66.7319	28.8977
B16DD060C-PH-PYRX4C	53.6917	0.1719	0.6861	16.8915	1.3725	0.4846	25.0531	1.6886	0.0089	0.0266	0	0.0116	100.087		0	147.61		1.96289	0.00472751	0.0295601	0	0.516411	0.0377581	0.0150047	1.3653	0.066139	0.000630793	0.00124045	0	0.000341113		3.30594	68.244	28.45
B16DD060C-PH-PYRX4R	52.4304	0.2067	0.5827	22.1183	1.38132	0.7097	20.9871	1.6062	0.0923	0.049	0.0724	0	100.236		1058.13	0		1.96527	0.00582838	0.0257404	0	0.693314	0.038962	0.0225304	1.17265	0.0645032	0.00670733	0.00234285	0.00214547	0		3.23817	58.8692	37.8926
B16DD060C-PH-PYRX5C	53.0159	0.2344	1.1927	15.7511	2.63314	0.443	24.9725	1.7252	0.1279	0.0296	0.0589	0	100.184		860.823	0		1.93608	0.00643936	0.0513309	0	0.481024	0.0723602	0.0137017	1.35943	0.0674993	0.00905516	0.00137885	0.0017005	0		3.3851	68.1755	28.4394
B16DD060C-PH-PYRX5R	52.1469	0.3409	1.068	25.1881	0.613654	0.8176	18.4499	1.8556	0.2248	0.0633	0.1643	0.0512	100.984		2401.24	651.52		1.96673	0.00967188	0.0332699	0.0141999	0.794421	0.017416	0.0261163	1.03726	0.0749795	0.0164369	0.00304529	0.0048989	0.00155323		3.84472	53.1876	42.9677
B16DD060C-PH-PYRX6C	51.7169	0.3674	1.5027	7.2071	2.95305	0.356	15.5502	19.968	0.2411	0.0223	0.0533	0.0414	99.9794		778.98	526.815		1.92508	0.0102878	0.0659201	0	0.224345	0.0827168	0.0112233	0.862835	0.796328	0.0173989	0.00105884	0.00156851	0.00123956		40.2705	43.6338	16.0957
B16DD060C-PH-PYRX6R	52.4008	0.4578	1.3862	13.2428	0.43486	0.5019	13.2063	18.7374	0.3074	0.0615	0.0527	0.0564	100.846		770.21	717.69		1.9639	0.012907	0.036095	0.0251313	0.415051	0.0122642	0.0159314	0.737803	0.752374	0.0223355	0.00294013	0.00156149	0.00170025		38.9141	38.1604	22.9255
B16DD060C-PH-PYRX7C	53.2741	0.2026	0.8184	16.3476	1.87334	0.5002	25.2011	1.5953	0.0035	0.0169	0.0873	0	99.9203		1275.89	0		1.95022	0.00557924	0.0353072	0	0.500449	0.0516052	0.0155084	1.3752	0.062568	0.000248396	0.000789157	0.00252654	0		3.12009	68.5772	28.3027
B16DD060C-PH-PYRX7R	52.3245	0.3021	0.9934	21.7908	0.373358	0.6478	21.3906	1.5769	0	0.0243	0.1079	0.0592	99.5909		1576.96	753.32		1.96498	0.00853437	0.0350237	0.00894124	0.684331	0.0105508	0.0206038	1.19744	0.0634452	0	0.00116404	0.00320346	0.00178824		3.21019	60.5878	36.202
B16DD060C-PH-PYRX8C	53.6244	0.237	0.5341	17.6884	1.05083	0.4379	24.5346	1.712	0.0281	0.0291	0.0072	0.0206	99.9043		105.228	262.135		1.96956	0.00654821	0.0231184	0	0.543293	0.0290433	0.0136218	1.34327	0.0673677	0.00200088	0.00136335	0.000209066	0.000608589		3.37413	67.278	29.3479
B16DD060C-PH-PYRX8R	51.1182	0.4075	0.8701	24.9303	0.958039	0.7221	18.6249	1.6799	0.078	0.0342	0.0423	0.0051	99.4705		618.215	64.8975		1.95806	0.0117421	0.039278	0	0.798577	0.0276148	0.0234262	1.06346	0.0689408	0.00579233	0.00167104	0.00128096	0.000157135		3.47831	53.6554	42.8663
B16DD060C-PH-PYRX9C	54.9498	0.0835	0.7603	10.9994	1.09651	0.3747	29.0819	1.7732	0	0.0342	0.0811	0.0658	99.3004		1185.28	837.305		1.96845	0.00225016	0.0315492	0.000548445	0.329509	0.0295584	0.0113683	1.55296	0.0680547	0	0.00156277	0.00229681	0.00189599		3.41735	77.9813	18.6014
B16DD060C-PH-PYRX9R	51.5232	0.3019	0.6051	24.3312	0.637755	0.7883	19.0855	1.7931	0.0491	0.0539	0	0.0152	99.1841		0	193.42		1.97208	0.00869267	0.0272948	0	0.778797	0.0183689	0.0255546	1.08894	0.0735307	0.00364344	0.0026316	0	0.000467969		3.70397	54.8531	41.443
B16DD060C-PH-PYRX10C	52.9932	0.2406	1.2085	17.2559	1.91051	0.4658	24.2614	1.6903	0.067	0.0207	0.0649	0.025	100.204		948.514	318.125		1.94354	0.00663801	0.0522337	0	0.529239	0.0527269	0.0144687	1.32638	0.0664171	0.00476384	0.000968397	0.00188176	0.000737506		3.33883	66.678	29.9831
B16DD060C-PH-PYRX10R	52.9101	0.2796	1.0782	17.5449	1.75662	0.5581	24.0447	1.722	0.0477	0.0207	0.072	0.021	100.056		1052.28	267.225		1.94634	0.00773723	0.0467423	0	0.539723	0.0486257	0.0173879	1.31849	0.0678665	0.00340179	0.000971314	0.00209391	0.000621371		3.4068	66.1862	30.407
B16DD061A-PH-PYRX2C	53.5168	0.168	0.5787	15.5565	3.47382	0.4744	25.6186	1.7095	0.0349	0.0126	0.0316	0.0185	101.194		461.834	235.412		1.93737	0.00457508	0.0246891	0	0.470948	0.0946318	0.0145452	1.38247	0.0663029	0.00244938	0.000581837	0.000904385	0.000538697		3.26793	68.1389	28.5931
B16DD061A-PH-PYRX2R	52.7704	0.2314	1.1089	15.668	3.36904	0.4457	25.0081	1.7359	0.07	0.0215	0.0277	0	100.457		404.836	0		1.92611	0.00635362	0.0476994	0	0.478236	0.0925346	0.013778	1.36066	0.0678823	0.00495332	0.00100101	0.000799309	0		3.37205	67.5905	29.0374
B16DD061A-PH-PYRX3C	53.0808	0.1532	0.8819	14.6772	3.76125	0.4715	25.7334	1.8526	0.0347	0.0172	0.0277	0	100.691		404.836	0		1.9268	0.00418338	0.0377268	0	0.445534	0.10274	0.0144956	1.39243	0.0720483	0.00244196	0.000796412	0.000794922	0		3.55399	68.6858	27.7603
B16DD061A-PH-PYRX3R	51.5945	0.2623	0.8514	20.654	4.0496	0.6437	21.1248	1.8831	0.0565	0.0324	0.0291	0.0686	101.25		425.297	872.935		1.92165	0.00734916	0.0373711	0	0.643302	0.113499	0.0203053	1.17285	0.0751428	0.0040797	0.00153931	0.000856859	0.00205517		3.71058	57.9156	38.3738
B16DD061A-PH-PYRX4C	50.2759	0.4231	2.3194	7.94439	3.77755	0.4017	14.1345	19.7909	0.3185	0.0178	0.0534	0.0236	99.4807		780.441	300.31		1.89491	0.0119961	0.103023	0	0.250396	0.107139	0.0128228	0.794118	0.799163	0.0232726	0.00085577	0.00159116	0.000715469		40.6981	40.4412	18.8608
B16DD061A-PH-PYRX4R	51.8881	0.2727	2.174	16.1169	1.73326	0.4487	23.6271	2.2755	0.0812	0.0534	0.0277	0.0524	98.7509		404.836	666.79		1.92597	0.00761441	0.0740259	0.0210724	0.50027	0.0484123	0.0141057	1.30729	0.0904903	0.00584316	0.00252833	0.000812845	0.00156446		4.61552	66.6791	28.7054
B16DD061A-PH-PYRX5C	54.159	0.1461	0.7296	12.5527	2.94355	0.3953	27.7725	1.6345	0.0298	0.0252	0.006	0.0442	100.438		87.69	562.445		1.94368	0.00394433	0.0308582	0	0.37673	0.0794941	0.0120154	1.48575	0.0628466	0.00207338	0.00115362	0.000170236	0.00127593		3.11609	73.6674	23.2165
B16DD061A-PH-PYRX5R	53.125	0.1789	0.9939	15.8152	2.98082	0.4974	25.0148	1.907	0.0323	0.0312	0.004	0.0316	100.612		58.46	402.11		1.93563	0.00490345	0.0426772	0	0.481879	0.0817273	0.0153491	1.35862	0.0744417	0.00228157	0.00145006	0.00011522	0.000926108		3.69985	67.5253	28.7749
B16DD061A-PH-PYRX6C	53.0536	0.1228	0.9147	15.6144	3.57147	0.538	25.2762	1.6524	0.0181	0.015	0	0.0314	100.808		0	399.565		1.93005	0.00336063	0.0392159	0	0.475028	0.0977707	0.0165764	1.3707	0.0644037	0.00127656	0.000696072	0	0.000918829		3.18125	67.7063	29.1124
B16DD061A-PH-PYRX6R	52.6921	0.2602	1.2479	15.3988	4.18038	0.5233	25.0785	1.7025	0.0571	0.0211	0.0138	0.0351	101.211		201.687	446.647		1.91244	0.00710425	0.0533769	0	0.467379	0.114174	0.016086	1.35682	0.0662022	0.00401779	0.000976865	0.000395975	0.00102471		3.27627	67.1473	29.5765
B16DD061A-PH-PYRX7C	52.432	0.2207	1.5621	3.64107	3.15379	0.303	17.0375	21.2884	0.223	0.0247	0	0.0679	99.9542		0	864.028		1.92699	0.00610173	0.0676584	0	0.111905	0.0872217	0.00943149	0.933399	0.838239	0.015889	0.00115795	0	0.00200726		42.3311	47.1367	10.5322
B16DD061A-PH-PYRX7R	54.0462	0.1425	1.2071	11.8841	2.57786	0.3395	28.2222	1.47	0.0503	0.0191	0.034	0.0163	100.009		496.91	207.417		1.93804	0.00384398	0.0510119	0	0.356373	0.069561	0.0103108	1.50858	0.0564752	0.00349683	0.000873657	0.000963879	0.000470151		2.82193	75.3799	21.7981
B16DD061A-PH-PYRX8C	51.3432	0.3542	1.4324	6.70278	3.20279	0.302	15.2299	20.4174	0.2755	0.031	0.0206	0.01	99.3218		301.069	127.25		1.92397	0.00998464	0.0632573	0	0.210044	0.0903135	0.00958468	0.850727	0.819707	0.0200146	0.00148179	0.000610279	0.000301417		41.3915	42.9578	15.6507
B16DD061A-PH-PYRX8R	51.0245	0.4422	1.9378	6.3556	4.19394	0.3002	15.3004	20.2815	0.288	0.0337	0.037	0.0201	100.215		540.755	255.772		1.89771	0.012372	0.0849357	0	0.197673	0.117377	0.0094562	0.848268	0.808153	0.020766	0.00159879	0.00108792	0.00060131		40.7967	42.8218	16.3815
B16DD061A-PH-PYRX9C	53.1821	0.1413	0.7163	14.9588	4.34724	0.4947	25.6928	1.6944	0.0504	0.0197	0.0492	0	101.347		719.058	0		1.92326	0.00384399	0.0305279	0	0.452384	0.118302	0.015152	1.38503	0.0656493	0.00353355	0.000908756	0.00140664	0		3.2236	68.0098	28.7666
B16DD061A-PH-PYRX9R	52.5685	0.1934	1.1955	15.0803	4.39644	0.4758	25.1388	1.8508	0.0389	0.03	0.0335	0.0068	101.009		489.603	86.53		1.91076	0.00528818	0.0512108	0	0.458385	0.120252	0.0146474	1.36208	0.0720747	0.00274119	0.00139095	0.000962656	0.000198812		3.55496	67.1824	29.2627
B16DD061A-PH-PYRX16C*	52.0579	0.367	2.4356	5.97836	1.68567	0.242	16.737	19.8467	0.2067	0.029	0.0187	0.0173	99.6219		273.3	220.142		1.92174	0.0101916	0.0782646	0.0276956	0.184556	0.046826	0.00756619	0.921005	0.784942	0.014793	0.00136557	0.00054575	0.000513694		40.3591	47.355	12.2859
B16DD061A-PH-PYRX17R*	53.735	0.125	0.7363	19.8347	0.760981	0.457	23.4479	1.4237	0.0417	0.0458	0.0013	0.0408	100.65		18.9995	519.18		1.97384	0.00345408	0.0261641	0.00571008	0.609284	0.0210347	0.0142175	1.28391	0.0560292	0.0029696	0.00214599	3.77522e-05	0.00120549		2.82337	64.6977	32.4789
B16DD061A-PH-PYRX18C*	54.6882	0.1694	1.4166	13.0183	0.763947	0.346	28.164	1.3828	0.016	0.0301	0.0163	0.0136	100.025		238.224	173.06		1.95669	0.00455943	0.0433069	0.016425	0.389513	0.0205684	0.0104848	1.50211	0.0530067	0.00110983	0.00137374	0.000461064	0.000391399		2.68296	76.0299	21.2871
B16DD061A-PH-PYRX18R*	53.4612	0.2653	1.2023	17.1979	0.77943	0.4384	24.7443	1.6774	0.0233	0.0279	0.007	0.0264	99.8509		102.305	335.94		1.95816	0.00730994	0.041845	0.0100531	0.526774	0.0214829	0.0135998	1.35102	0.0658244	0.00165452	0.00130353	0.000202699	0.000777792		3.32665	68.2781	28.3953
B16DD061A-PH-PYRX19C*	54.8273	0.1668	1.4833	12.5322	1.23778	0.3388	28.4807	1.4381	0.0154	0.0176	0.0327	0.0354	100.606		477.911	450.465		1.94939	0.00446134	0.0506136	0.0115392	0.372621	0.0331171	0.0102023	1.50949	0.0547813	0.00106152	0.00079822	0.000919166	0.00101241		2.76644	76.2287	21.0049
B16DD061A-PH-PYRX19R*	53.4109	0.2444	1.4622	16.9106	1.11768	0.4171	24.8859	1.742	0.015	0.0137	0.0078	0.0183	100.246		113.997	232.867		1.94781	0.00670481	0.0521888	0.0106538	0.515721	0.0306719	0.0128828	1.35284	0.0680624	0.00106051	0.000637304	0.000224883	0.000536808		3.43718	68.3192	28.2436
B16DD061A-PH-PYRX20C*	54.5307	0.1456	1.2119	13.8233	1.27308	0.3358	27.6872	1.3236	0.0065	0.0071	0.0013	0.0259	100.372		18.9995	329.577		1.95443	0.00392562	0.0455714	0.00561751	0.414315	0.0343354	0.0101933	1.47923	0.050825	0.000451648	0.000324598	3.68355e-05	0.000746672		2.55544	74.3743	23.0703
B16DD061A-PH-PYRX20R*	54.533	0.1616	1.2089	13.3073	1.30232	0.3384	27.9141	1.3563	0.0095	0.0062	0.0264	0.0512	100.215		385.836	651.52		1.95413	0.00435616	0.0458674	0.00518489	0.398772	0.0351172	0.0102702	1.49106	0.0520706	0.000659974	0.000283397	0.0007479	0.00147576		2.62018	75.0298	22.35
B16DD061B-PH-PYRX1C	53.0791	0.1596	0.9572	16.0893	3.14053	0.4797	24.9263	1.7314	0.0672	0.0196	0.0354	0.0066	100.692		517.371	83.985		1.93452	0.00437572	0.0411132	0	0.490372	0.0861311	0.0148072	1.35421	0.0676065	0.00474817	0.000911201	0.00101999	0.000193484		3.35829	67.2689	29.3728
B16DD061B-PH-PYRX1R	52.8949	0.2226	1.1047	14.8504	3.58653	0.4634	25.5263	1.7546	0.0627	0.0303	0.061	0	100.557		891.515	0		1.92322	0.00608846	0.0473357	0	0.451535	0.0981288	0.01427	1.3835	0.0683493	0.00441967	0.00140529	0.00175343	0		3.39071	68.6334	27.9759
B16DD061B-PH-PYRX2C	52.3349	0.1965	1.2049	15.1527	4.62322	0.4806	24.8365	1.9165	0.0649	0.0296	0.0902	0.0004	100.931		1318.27	5.09		1.90705	0.00538643	0.051743	0	0.461743	0.126772	0.0148323	1.34908	0.0748206	0.00458483	0.00137585	0.00259849	1.17242e-05		3.69074	66.5474	29.7618
B16DD061B-PH-PYRX2R	52.5807	0.2339	1.1292	15.5401	2.67342	0.478	24.9312	1.685	0.0756	0.0257	0.0571	0.0118	99.4218		834.517	150.155		1.93485	0.00647467	0.0489689	0	0.478205	0.0740277	0.0148971	1.36754	0.0664296	0.00539324	0.00120632	0.00166112	0.000349263		3.31965	68.3395	28.3409
B16DD061B-PH-PYRX3C	53.1508	0.1591	0.6039	16.4069	3.01307	0.4594	24.8818	1.6404	0.0452	0.0296	0.0118	0.0259	100.428		172.457	329.577		1.94403	0.00437754	0.0260308	0	0.501832	0.0829295	0.0142311	1.3566	0.0642812	0.00320508	0.001381	0.000341208	0.00076198		3.18244	67.1626	29.6549
B16DD061B-PH-PYRX3R	52.6305	0.1849	1.227	16.5831	4.10133	0.5034	24.3288	1.677	0.0575	0.0381	0	0.0384	101.37		0	488.64		1.91646	0.00506485	0.0526546	0	0.504973	0.112381	0.0155249	1.32057	0.065424	0.00405918	0.00176968	0	0.00112472		3.24062	65.4112	31.3482
B16DD061B-PH-PYRX4C	53.47	0.1337	0.8209	14.646	2.70759	0.4273	26.3029	1.3955	0.0354	0.0111	0.0118	0.038	100		172.457	483.55		1.94416	0.00365697	0.0351757	0	0.445328	0.0740821	0.0131586	1.42562	0.0543618	0.00249536	0.000514818	0.000339194	0.00111136		2.70115	70.8364	26.4624
B16DD061B-PH-PYRX4R	52.732	0.1892	1.7826	14.2504	2.94914	0.3667	25.9787	1.5414	0.0214	0.041	0.0374	0.0342	99.9242		546.601	435.195		1.91841	0.00517793	0.0764277	0	0.433545	0.0807366	0.0112988	1.40884	0.0600792	0.00150935	0.00190265	0.00107568	0.00100079		3.01225	70.6362	26.3515
B16DD061B-PH-PYRX5C	52.4458	0.2402	1.3219	15.1053	4.64594	0.4035	25.1762	1.7403	0.0387	0.0046	0.0059	0.0404	101.169		86.2285	514.09		1.90425	0.00656077	0.0565643	0	0.45865	0.126939	0.0124083	1.36264	0.0676986	0.00272416	0.00021305	0.00016936	0.0011799		3.33764	67.1802	29.4822
B16DD061B-PH-PYRX5R	52.4786	0.1962	1.2007	14.0278	4.5646	0.4339	25.6376	1.8584	0.0409	0.0228	0.0157	0.0428	100.52		229.455	544.63		1.9094	0.00537009	0.0514848	0	0.426818	0.124976	0.0133708	1.39049	0.0724429	0.002885	0.00105818	0.000451605	0.00125259		3.57196	68.5614	27.8667
B16DD061B-PH-PYRX6C	52.6258	0.2	1.2986	15.5083	2.14995	0.4813	25.0322	1.7545	0.0216	0.0167	0.0039	0.0328	99.1256		56.9985	417.38		1.93855	0.00554213	0.0563747	0	0.477729	0.0595957	0.0150158	1.37454	0.0692428	0.00154256	0.000784701	0.000113576	0.000971861		3.46887	68.8604	27.6707
B16DD061B-PH-PYRX6R	52.6449	0.2624	1.1097	15.7389	2.63022	0.512	24.9682	1.6915	0.0332	0.0114	0.0137	0.024	99.6401		200.226	305.4		1.93432	0.00725276	0.0480515	0	0.483599	0.0727229	0.015933	1.36753	0.0665864	0.00236493	0.0005343	0.000397958	0.000709307		3.31875	68.1593	28.5219
B16DD061B-PH-PYRX7C	52.6821	0.2842	1.4859	15.2775	3.94245	0.4407	25.2932	1.6614	0.0308	0.0075	0	0.0517	101.157		0	657.883		1.90951	0.0077491	0.0634715	0	0.463075	0.107531	0.0135287	1.3666	0.0645172	0.0021643	0.00034676	0	0.0015073		3.20145	67.8128	28.9857
B16DD061B-PH-PYRX7R	52.2389	0.2066	1.6113	15.3229	3.31774	0.4608	24.7447	1.6421	0.0524	0.0745	0	0.0629	99.7349		0	800.402		1.91902	0.00570933	0.0697578	0	0.470726	0.0917144	0.0143368	1.35502	0.0646291	0.00373187	0.00349102	0	0.00185861		3.23724	67.8723	28.8905
B16DD061B-PH-PYRX8C	53.3671	0.1549	0.6194	15.4043	3.33208	0.4449	25.6031	1.7188	0.0306	0.0124	0	0.028	100.716		0	356.3		1.93913	0.00423403	0.0265238	0	0.468077	0.0911081	0.0136915	1.38677	0.0669116	0.00215558	0.000574731	0	0.000818358		3.30174	68.4299	28.2684
B16DD061B-PH-PYRX8R	52.5488	0.2142	1.3351	14.9785	2.52894	0.4468	25.2985	1.7262	0.0253	0.0145	0	0.0455	99.1624		0	578.987		1.93273	0.00592646	0.0578698	0	0.460699	0.0699929	0.013918	1.38701	0.0680207	0.001804	0.000680276	0	0.00134608		3.40164	69.363	27.2354
Phenocryst Transect 1
B16DD060B-PH-PYRX5-C-R-Trans-1	53.6854	0.1617	1.1289	12.8269	3.86132	0.4164	27.522	1.3339	0.0417	0.0239	0.034	0.0208	101.057		496.91	264.68		1.92193	0.00435471	0.0476285	0	0.38401	0.104022	0.0126254	1.46872	0.0511619	0.00289418	0.00109141	0.000962288	0.000598957		2.53209	72.6895	24.7784
B16DD060B-PH-PYRX5-C-R-Trans-2	53.1579	0.2406	1.2933	12.2377	3.48839	0.3216	27.541	1.4354	0.0288	0.0238	0.028	0.0283	99.8247		409.22	360.117		1.92049	0.00653895	0.0550648	0	0.369728	0.094837	0.00984045	1.4832	0.0555596	0.00201718	0.00109681	0.000799737	0.000822398		2.75981	73.6751	23.5651
B16DD060B-PH-PYRX5-C-R-Trans-3	51.9832	0.3861	1.1458	19.6452	3.4345	0.5018	22.4501	1.6198	0.042	0.0222	0.0137	0	101.244		200.226	0		1.9185	0.0107193	0.0498353	0	0.606308	0.0953829	0.015685	1.23507	0.0640474	0.00300508	0.00104511	0.000399727	0		3.17617	61.2485	35.5753
Phenocryst Transect 2
B16DD060C-PH-PYRX11-C-R-Trans-1	52.8437	0.2735	1.029	16.7231	1.21945	0.4305	24.4686	1.7206	0.0513	0.0315	0.0734	0.0427	98.9073		1072.74	543.358		1.95575	0.00761456	0.0442549	0.000626383	0.517579	0.033962	0.0134942	1.34991	0.0682247	0.00368082	0.0014871	0.00214763	0.00127115		3.44018	68.0683	28.4915
B16DD060C-PH-PYRX11-C-R-Trans-2	53.4566	0.32	1.2434	14.8086	3.1254	0.5636	25.8843	1.9257	0.0091	0.0212	0.1062	0.0411	101.505		1552.11	522.997		1.92316	0.00866027	0.0527174	0	0.44552	0.084611	0.0171727	1.38812	0.074224	0.000634692	0.000972878	0.00302053	0.00118934		3.69338	69.0728	27.2338
B16DD060C-PH-PYRX11-C-R-Trans-3	54.4298	0.1157	1.0343	12.1433	2.27395	0.471	28.2707	1.4426	0.03	0.0243	0.0659	0.0403	100.342		963.129	512.817		1.94632	0.00311228	0.0435868	0	0.363123	0.0611882	0.0142644	1.50693	0.055267	0.00207973	0.00110839	0.00186298	0.00115914		2.76229	75.3174	21.9203
B16DD060C-PH-PYRX11-C-R-Trans-4	53.518	0.2152	1.0307	15.9614	2.15076	0.5096	25.3681	1.5545	0.0608	0.0246	0.1083	0.0503	100.552		1582.8	640.067		1.94525	0.00588419	0.0441508	0	0.485164	0.0588271	0.0156877	1.37449	0.0605354	0.00428439	0.00114057	0.00311207	0.0014706		3.03481	68.907	28.0582
B16DD060C-PH-PYRX11-C-R-Trans-5	51.4525	0.2905	0.9327	23.7995	1.63935	0.7182	19.488	1.6298	0.0698	0.0367	0.1058	0	100.163		1546.27	0		1.94939	0.00827957	0.0416453	0	0.754051	0.0467384	0.0230459	1.10062	0.0661561	0.00512693	0.00177365	0.00316901	0		3.32341	55.2905	41.3861
Phenocryst Transect 3
B16DD061A-PH-PYRX1-C-R-Trans-1	54.2092	0.1354	0.7732	12.1171	1.64749	0.3722	27.8964	1.7567	0.0453	0.0148	0.0221	0.076	99.0659		322.992	967.1		1.96123	0.00368504	0.0329669	0	0.366602	0.0448525	0.0114048	1.50446	0.0680919	0.00317733	0.000683009	0.00063211	0.00221167		3.41242	75.396	21.1915
B16DD061A-PH-PYRX1-C-R-Trans-2	53.8867	0.1686	1.2146	12.8325	3.78558	0.3828	27.5428	1.3981	0.0478	0.0173	0.0379	0.0721	101.387		553.909	917.472		1.9227	0.00452538	0.0510732	0	0.382894	0.101641	0.0115679	1.46492	0.0534453	0.00330648	0.00078738	0.00106909	0.00206926		2.65307	72.7199	24.627
B16DD061A-PH-PYRX1-C-R-Trans-3	51.6533	0.3619	0.8313	22.0954	3.01634	0.6736	20.3525	1.8742	0.0763	0.0385	0	0.0568	101.03		0	722.78		1.93436	0.0101952	0.0366883	0	0.691958	0.0850016	0.0213647	1.13615	0.0751965	0.00553952	0.00183912	0	0.00171096		3.74174	56.534	39.7242
Phenocryst Transect 4
B16DD061B-PH-PYRX9-C-R-Trans-1	54.6315	0.0714	0.8067	13.219	3.8812	0.4368	27.7639	1.4879	0.0417	0.0195	0.024	0.0285	102.412		350.76	362.663		1.93199	0.00189945	0.0336205	0	0.390932	0.103285	0.0130828	1.46359	0.0563739	0.00285895	0.000879642	0.000670994	0.000810697		2.78078	72.1954	25.0238
B16DD061B-PH-PYRX9-C-R-Trans-2	52.2993	0.1617	1.1847	15.6227	4.012	0.3934	24.6445	1.8706	0.0347	0.0269	0.0272	0.0329	100.311		397.528	418.652		1.91706	0.0044588	0.0511774	0	0.47889	0.110664	0.0122132	1.34659	0.073462	0.00246591	0.00125777	0.000788231	0.000970033		3.63345	66.603	29.7636
B16DD061B-PH-PYRX9-C-R-Trans-3	53.3705	0.1071	1.4532	11.9782	3.28417	0.3502	27.6194	1.5815	0.0122	0.0262	0.0885	0.0655	99.9367		1293.43	833.487		1.92337	0.00290348	0.0617188	0	0.360987	0.0890626	0.0106889	1.48373	0.0610623	0.000852374	0.0012044	0.00252145	0.00189869		3.0447	73.9819	22.9734
B16DD061B-PH-PYRX9-C-R-Trans-4	53.6171	0.1685	1.2251	11.8829	4.15809	0.4007	27.8785	1.4634	0.0549	0.0218	0.0858	0.0306	100.987		1253.97	389.385		1.91584	0.00452922	0.051589	0	0.355072	0.111804	0.0121263	1.48492	0.0560223	0.00380309	0.000993622	0.00242375	0.000879485		2.77346	73.5129	23.7137
B16DD061B-PH-PYRX9-C-R-Trans-5	53.4	0.1546	1.436	11.2842	4.49712	0.3711	28.095	1.4738	0.0403	0.0286	0.1039	0.032	100.917		1518.5	407.2		1.90672	0.00415262	0.0604268	0	0.336942	0.120834	0.0112225	1.49538	0.0563801	0.00278971	0.00130263	0.00293296	0.000919065		2.79004	74.001	23.209
Phenocryst Transect 5
B16DD061B-PH-PYRX10-C-R-Trans-1	49.316	0.5503	2.3176	4.52927	5.88292	0.2752	15.2377	20.3374	0.294	0.0259	0.0202	0	98.7865		295.223	0		1.86044	0.0156169	0.103038	0	0.142888	0.167004	0.00879286	0.856889	0.821986	0.0215022	0.00124634	0.000602453	0		41.1495	42.8968	15.9537
B16DD061B-PH-PYRX10-C-R-Trans-2	51.2495	0.3383	2.0416	3.12663	5.06338	0.2106	16.6282	21.1977	0.2689	0.0301	0.0672	0.0389	100.261		982.128	495.002		1.88669	0.00936872	0.0885749	0	0.0962556	0.140268	0.00656634	0.912501	0.836067	0.0191915	0.00141347	0.0019558	0.00115189		41.9784	45.8161	12.2054
B16DD061B-PH-PYRX10-C-R-Trans-3	49.8566	0.5423	2.2195	6.63694	5.67503	0.3274	14.5482	19.9146	0.3415	0.0355	0.0201	0	100.118		293.762	0		1.86862	0.01529	0.0980357	0	0.208021	0.160057	0.0103928	0.812803	0.799673	0.0248141	0.00169721	0.00059558	0		40.1655	40.8249	19.0096
Note: In the analysis ID: GM - groundmass, PH - phenocryst, C - phenocryst core, R - phenocryst rim, and C-R-Trans is a core to rim transect with an analyses taken every 50 µm. An * after the analysis ID denotes analysis at the Stanford University Mineral and Microchemical Analysis Facility, whereas all other analysis are from the U.S. Geological Survey in Menlo Park, California.
